1  
2  
3  
4  
5  
6  
7  
8  
9  
10  
11  
12  
13  
14  
15  
16  
17  
18  
19  
20  
21

**Choline Transporter in  $\alpha/\beta$  core neurons of *Drosophila*  
mushroom body non-canonically regulates pupal eclosion  
and maintains neuromuscular junction integrity**

**Runa Hamid<sup>1\*</sup>, Nikhil Hajirnis<sup>1</sup>, Shikha Kushwaha<sup>2</sup>, Sadaf Saleem<sup>3</sup>,  
Vimlesh Kumar<sup>2</sup>, Rakesh K Mishra<sup>1</sup>**

*<sup>1</sup>Center for Cellular and Molecular Biology, Council of Scientific and Industrial Research  
(CSIR-CCMB), Uppal Road, Hyderabad, India; <sup>2</sup>Indian Institute of Science Education and  
Research, Bhopal, India; <sup>3</sup>University of Kashmir, Kashmir, India*

\*To whom correspondence should be addressed:

**Corresponding author:** Phone-+91-40- 27192783

Email- runahamid@ccmb.res.in

**Keywords:** Mushroom body, *Drosophila*, Choline transporter, eclosion

22 **Abstract:**

23 Insect mushroom bodies (MB) have an ensemble of synaptic connections well-studied for their  
24 role in experience-dependent learning and several higher cognitive functions. MB requires  
25 neurotransmission for an efficient flow of information across synapses with the different  
26 flexibility to meet the demand of the dynamically changing environment of an insect.  
27 Neurotransmitter transporters coordinate appropriate changes for an efficient  
28 neurotransmission at the synapse. Till date, there is no transporter reported for any of the  
29 previously known neurotransmitters in the intrinsic neurons of MB. In this study, we report a  
30 highly enriched expression of Choline Transporter (ChT) in *Drosophila* MB. We demonstrate  
31 that knockdown of ChT in a sub-type of MB neurons called  $\alpha/\beta$  core ( $\alpha/\beta$ c) neurons leads to  
32 eclosion failure, peristaltic defect in larvae, and altered NMJ phenotype. These defects were  
33 neither observed on knockdown of proteins of the cholinergic locus in  $\alpha/\beta$ c neurons nor by  
34 knockdown of ChT in cholinergic neurons. Thus, our study provides insights into non-  
35 canonical roles of ChT in MB.

36

37

38

39

40

41

42

43

44

45

## 46 **Introduction:**

47 Acetylcholine (ACh) is essential for higher cognitive functions and in many of the  
48 developmental events of CNS. The components of ACh metabolic cycle namely, Choline  
49 acetyltransferase (ChAT), vesicular acetylcholine transporter (VACHT), Acetylcholine  
50 esterase (AChE) and Choline transporter (ChT) work in synchronization with each other to  
51 bring efficient neurotransmission at cholinergic synapses. Timely removal of ACh from  
52 synaptic cleft is a key step of synaptic transmission mediated by ChT. For resynthesis of ACh,  
53 ChT transports choline into the presynaptic terminal which is produced by the enzymatic action  
54 of Acetylcholine esterase (AChE) at the synapse. There are few, but intriguing evidence, that  
55 associate ChT with neuromuscular dysfunction, congenital myasthenic syndrome, severe  
56 neurodevelopmental delay and brain atrophy (Barwick et al., 2012; Wang et al., 2017). ChT  
57 mutants demonstrate motor activity defects in *C. elegans* (Matthies et al., 2006). Alzheimer's  
58 disease has also been associated with altered levels of ChT in cholinergic neurons (Bissette et  
59 al., 1996; Pascual et al., 1991). The cognitive significance of ChT has also been indicated in  
60 rodents performing various tasks (Durkin, 1994; Toumane et al., 1989; Wenk et al., 1984).  
61 Although sparse, all the previous studies bring into focus a highly important role of ChT in  
62 cholinergic nerve terminals.

63 A recent study demonstrates that intrinsic neurons of *Drosophila* mushroom bodies (MB) are  
64 principally cholinergic and express ChAT and VACHT. (Barnstedt et al., 2016). This contrasts  
65 with the previous findings that show components of the cholinergic cycle are absent from MB  
66 (Gorczyca and Hall, 1987; Yasuyama et al., 1995). For an efficient cholinergic  
67 neurotransmission in these structures, all the components of the cholinergic cycle should be  
68 present. This knowledge is still obscure. It remains unclear whether: (a) all the intrinsic cells  
69 of MB are cholinergic in nature or (b) different cells represent a different type of  
70 neurochemical. A specific subset of MB intrinsic neurons called  $\alpha/\beta$  core ( $\alpha/\beta_c$ ) neurons

71 transiently uses Glutamate as a neurotransmitter at the time of eclosion (Sinakevitch et al.,  
72 2010). Studies also show the presence of aspartate and taurine in a limited number of intrinsic  
73 neurons of MB (Sinakevitch et al., 2001). However, Glutamate transporter, vGLUT, is absent  
74 from core neurons or other intrinsic neurons of MB (Daniels et al., 2008). Transporters for  
75 GABA (DvGAT) and monoamines (DvMAT) are also absent in intrinsic neurons of MB  
76 (Chang et al., 2006; Fei et al., 2010). Taken together, different studies describe different  
77 neurotransmitter in intrinsic neurons of MB but the transporters for the known  
78 neurotransmitters are absent from these cells. *Drosophila portabella* gene has been previously  
79 reported as a putative transporter in MB, but no definitive neurotransmitter has been defined  
80 for it (Brooks et al., 2011). In the absence of any transporter, it is not clear how neurotransmitter  
81 release and consequently different synaptic strengthening is achieved which might underlie  
82 cognitive and developmental events in this structure.

83 Here, we report for the first time, the presence of ChT in MB and demonstrate a distinct  
84 localization of endogenous ChT in all the major lobes of MB. Knockdown of ChT specifically  
85 in  $\alpha/\beta$  core ( $\alpha/\beta_c$ ) neurons leads to severe eclosion failure without affecting any larval or pupal  
86 development. We also report peristalsis defect and altered NMJ phenotype in these animals.  
87 All the three phenotypes: eclosion failure, peristaltic defect, and altered NMJ phenotype are  
88 rescued to a significant amount by transgenic over-expression of ChT in  $\alpha/\beta_c$  neurons.  
89 Furthermore, we demonstrate that the function of ChT in  $\alpha/\beta_c$  neurons is independent of the  
90 cholinergic pathway. Our results suggest that the role of ChT to transport choline for ACh  
91 synthesis might not be exclusive, at least in  $\alpha/\beta_c$  neurons. Together, our study reveals a new  
92 marker for the *Drosophila* MB and suggests its specific role in eclosion and maintenance of  
93 NMJ integrity. Defective NMJ due to knockdown of ChT might be the underlying cause of  
94 eclosion failure. In view of any transporter being absent in MB, our findings have broad

95 implications in understanding the functioning of the neural circuits in MB - a region that  
96 controls animal behavior and higher cognitive functions.

## 97 **Results:**

### 98 **Choline transporter is enriched in *Drosophila* mushroom body**

99 ChT is a phylogenetically conserved protein. It was first identified in *C.elegans* followed by  
100 rat, mouse, humans and other species (Apparsundaram et al., 2001; Apparsundaram et al.,  
101 2000; O'Regan et al., 2000; Okuda et al., 2000; Wang et al., 2001). It has a high binding affinity  
102 for choline ( $K_m \sim 1-5 \mu\text{M}$ ) in the nervous system (Kuhar and Murrin, 1978; Lockman and Allen,  
103 2002). *Drosophila* genome also has an annotated ChT homolog, *CG7708*. To study the function  
104 of ChT in CNS, we generated a polyclonal antibody against the 125 amino acid long C-terminal  
105 of ChT protein. Immunostaining of ventral ganglia with pre-immune sera did not show any  
106 immunoreactivity whereas affinity purified anti-ChT serum showed predominant  
107 immunoreactivity in the neuropil of ventral nerve cord (VNC) of the third instar larval brain  
108 (Fig.S1 A-F). This suggests an enrichment of the endogenous ChT protein at the neuropilar  
109 synapses. We assessed the specificity of this antibody for the endogenous ChT protein.  
110 Immunostaining of larval ventral ganglion of *Elav<sup>C155</sup>GAL4* driven *ChT* RNAi (ChT<sup>RNAi</sup>)  
111 showed a significant reduction of ChT immunoreactivity at the central synapses of VNC as  
112 compared to control while costaining with anti-ChAT showed no reduction in  
113 immunoreactivity of ChAT protein (Fig. S1 G-L). In addition, to determine if the ChT is  
114 localized at cholinergic synapses, we assessed colocalization of ChT protein with canonical  
115 proteins of the cholinergic cycle, ChAT, and VACHT of the cholinergic locus. By  
116 immunostaining of 3<sup>rd</sup> instar larval VNC, we observed an extensive colocalization of ChT with  
117 both ChAT and VACHT in the neuropilar areas (Fig.S2 A-F). ChT also colocalizes with ChAT  
118 in other cholinergic synaptic rich regions of the brain like Bolwig nerve (Fig.S2 G-I) and

119 antennal lobes (AL) (Fig S2. J-L). Together, these data show that ChT antibody specifically  
120 recognizes endogenous ChT protein at cholinergic synapses of VNC.

121 In *Drosophila* central brain, we observed that ChT staining was pronounced at the  
122 neuropil of the larval central brain and sub-oesophageal ganglia (SOG). It colocalizes  
123 extensively with ChAT (Fig. 1A). Strikingly, we observed expression of ChT but not ChAT in  
124 the MB of the larval brain (Fig. 1A, A'). This pattern of expression was maintained post-  
125 metamorphosis in adult brain as well (Fig. 1B, B'). During development of the adult brain, the  
126 first lobe of MB formed is the  $\gamma$  lobe which grows until mid-third instar larval stage. The next  
127 is,  $\alpha'/\beta'$  which continues to form till puparium formation. Lastly,  $\alpha/\beta$  lobes are formed from  
128 the puparium stage until adult eclosion (Lee et al., 1999). Immunostaining with anti-Disc large  
129 (anti-Dlg) and costaining with anti-ChT showed an immense localization of ChT in all the three  
130 lobes as well as in spur region of MB (Fig. 1C, D, E, E'). Altogether, these data suggest that  
131 ChT is explicitly expressed in all the lobes of *Drosophila* MB. Given the importance of MB  
132 in insect behavior, the ubiquitous expression of ChT in MB is intriguing, indicating ChT to be  
133 a critical protein for MB physiology and functioning.

#### 134 **ChT function in $\alpha/\beta$ core neurons of the mushroom body is required for eclosion**

135 To investigate the functional relevance of ChT in MB, we used RNAi transgene of *ChT*  
136 (*ChT<sup>RNAi</sup>*) to cause a reduction in the expression of *ChT* mRNA levels. For this, we used GAL4  
137 drivers specific for expression in different lobes of MB (Aso et al., 2009). The expression  
138 pattern of the driver lines was checked by driving expression of *mCD8GFP* with GAL4 and  
139 immunostaining of adult brain with anti-ChT. *201YGAL4* showed specific expression in  
140 densely packed fibers of  $\alpha/\beta$  core ( $\alpha/\beta_c$ ) in the center and  $\gamma$  lobe (Fig. 2A). Knockdown of  
141 ChT in these neurons showed eclosion failure in more than 90% of progeny as compared to the  
142 control (Fig.2C and Table 1). The co-staining with anti-ChT and anti-Dlg showed that the

143 anatomy of MB is intact and there is no apparent developmental defect in the overall  
144 morphology of the brain due to knock down of ChT (Fig. 2B). We found that  
145 *201YGAL4>ChT<sup>RNAi</sup>* flies develop normally throughout the larval and pupal stages (Fig. 2D).  
146 However, from these observations, we cannot rule out the possibility of any developmental  
147 defect in the establishment of neural circuits, caused due to the reduction of ChT. Indeed, the  
148 flies are alive till more than P14 stage (Video1). Some of the flies were also unable to push  
149 themselves out of the pupal case consequently leading to the death of the flies (Video 2). 10%  
150 flies escape, display severe flight and motor defects and die within a day or two (Fig. 2C and  
151 Table 1). The escapies also show abnormal abdominal melanization and wing expansion failure  
152 (data not shown). To confirm if the eclosion failure is due to knock down of ChT in  $\alpha/\beta$ c  
153 neurons, the fly was removed from the pupal case and brain was dissected out. Immunostaining  
154 of dissected adult brain of *201YGAL4>ChT<sup>RNAi</sup>*, with anti-ChT, showed significant reduction  
155 of ChT intensity normalized to the ChT intensity in the neuropilar areas outside MB (Control  
156  $1.02\pm 0.09$ , N=12; *201YGAL4>ChT<sup>RNAi</sup>*  $0.48\pm 0.05$ , N=12; Fig. 2E and 2G). Transgenic  
157 overexpression of UAS-*ChT* in MB by *201YGAL4* significantly restored ChT levels in MB  
158 (*201YGAL4/ChT<sup>RNAi</sup>;UAS-ChT/UAS-ChT*,  $0.88\pm 0.05$ , N=18, Fig. 2F and G). We also  
159 observed rescue of eclosion failure to a significant level by expression of a single copy of UAS-  
160 *ChT* transgene and a double copy of UAS-*ChT* transgene (Fig. 2H and Table1). Taken together  
161 these data suggest a specific role of ChT in  $\alpha/\beta$ c neurons to regulate eclosion of adult  
162 *Drosophila* flies from the pupal case.

163 Since ChT is present ubiquitously in MB, we explored if knockdown of ChT in other lobes of  
164 MB also shows similar eclosion failure. We first checked the expression of another GAL4,  
165 *MB247GAL4*, using UASmCD8GFP. The progeny showed strongly labeled  $\alpha/\beta$  surface ( $\alpha/\beta$ s),  
166  $\alpha/\beta$  posterior ( $\alpha/\beta$ p) but a very weak expression in  $\alpha/\beta$ c neurons and  $\gamma$  lobe (Fig. 2I).  
167 Knockdown of ChT by expression of UASChT<sup>RNAi</sup> in these neurons showed significant

168 reduction of ChT immunoreactivity in the adult brain of *MB247GAL4>ChT<sup>RNAi</sup>* (Control  
169  $1.02\pm 0.09$ , N=9; *MB247/ChT<sup>RNAi</sup>*  $0.58\pm 0.04$ , N=12, Fig.2 J-K). However, there was no  
170 eclosion failure observed (Fig. 2L). Since ChT knockdown in  $\alpha/\beta$ s and  $\alpha/\beta$ p neurons did not  
171 show any eclosion defects, we assessed for mobility defects in these flies using climbing assay.  
172 Flies are negatively geotactic and have a natural tendency to move against gravity when  
173 agitated. We did not find any significant climbing defects due to reduction of ChT in  $\alpha/\beta$ s and  
174  $\alpha/\beta$ p neurons as compared to controls (Fig. S3 A). We next assessed downregulation of ChT in  
175  $\alpha'/\beta'$  lobe by *C305aGAL4* which also did not show any eclosion failure compared to their  
176 genetic controls (Fig. S3 B and Table 1).

177 Together, these data suggest that ChT in  $\alpha/\beta$ c neurons play a specific role in eclosion of fly  
178 from the pupal case. ChT seems to play, as yet unidentified function in other neurons of MB.  
179 These findings also support the idea that ChT may have a differential function in different  
180 intrinsic neurons of KC.

### 181 **The function of ChT in $\alpha/\beta$ c neurons is independent of the cholinergic pathway**

182 An earlier study using immunolocalization demonstrated that ChAT and VAcChT are absent  
183 from MB (Gorczyca and Hall, 1987). On the other hand, microarray analysis in another study  
184 suggested that ChAT and VAcChT are present to comparable amounts both inside and outside  
185 of MB lobes (Perrat et al., 2013). More recent study shows that KC expresses ChAT and  
186 VAcChT and suggest that the majority of KC are cholinergic (Barnstedt et al., 2016) . In the  
187 present study, we reinvestigated for the presence of ChAT and VAcChT along with ChT by  
188 immunostainings. We observed that ChT shows immense immunoreactivity in all the lobes of  
189 MB whereas ChAT immunoreactivity is not detectable (Fig. S4). Although, VAcChT shows  
190 little immunoreactivity but from these experiments, we cannot rule out the possibility if it is  
191 due to extrinsic neuropilar area. To clarify if there are any cholinergic innervations in MB, we



192 expressed mCD8GFP using *ChATGAL4* and co-stained *ChATGAL4>ChT<sup>RNAi</sup>* adult brain with  
193 anti-ChT. We observed very less amount of mCD8-GFP fibers restricted only to peripheral  
194 areas of  $\alpha/\beta$  lobe (Fig. 3A). However, there is a possibility that these fibers belong to the  
195 extrinsic cholinergic processes and not to MB. Taken together, our results suggest that either  
196 there are very less number of cholinergic innervations in MB or they are altogether absent.

197 We also investigated if the eclosion failure observed due to depletion of ChT is dependent on  
198 cholinergic metabolic cycle or not by downregulating ChT in *ChATGAL4>ChT<sup>RNAi</sup>* flies and  
199 observed that eclosion was perfectly normal (Fig.3B, Table 1). We quantitated the ChT  
200 intensity in *ChATGAL4>ChT<sup>RNAi</sup>* adult brain and observed a significant reduction of ChT in  
201 outer neuropilar areas ( $I_{ON}$ ) as compared to ChT intensity inside  $\alpha/\beta$  lobes ( $I_{\alpha/\beta}$ ). The normalised  
202 intensity ( $I_{\alpha/\beta}/I_{ON}$ ) in *ChATGAL4>ChT<sup>RNAi</sup>* was higher than its genetic control *ChATGAL4>+*  
203 (Control  $1.01\pm 0.08$ , N=9; *ChATGAL4/ChT<sup>RNAi</sup>*  $1.89\pm 0.29$ , N=9, Fig. 3 C-D). To further  
204 confirm the non-cholinergic role of ChT in  $\alpha/\beta$ c MB neurons in eclosion, we downregulated  
205 *VChT<sup>RNAi</sup>* and *ChAT<sup>RNAi</sup>* in  $\alpha/\beta$ c neurons and did not observe any eclosion failure as  
206 compared to its genetic control (Fig. 3 E-F). Taken together, these data strongly suggest that  
207 pupal eclosion failure is specifically due to ChT downregulation in  $\alpha/\beta$ c neurons. The function  
208 of ChT in these neurons are functionally uncoupled from cholinergic locus suggesting  $\alpha/\beta$ c  
209 neurons being non-cholinergic in nature. It also indicates that ChT is present in a much larger  
210 number of KCs which might necessarily not be cholinergic.

### 211 **ChT function in $\alpha/\beta$ core neurons regulate peristalsis through a cholinergic independent** 212 **pathway**

213 Eclosion of flies from the pupal case involves coordinated contraction and relaxation of whole  
214 body muscles (Kimura and Truman, 1990; Rivlin et al., 2004). This process helps in the  
215 forward movement to drive the fly out of the pupal case. To understand the eclosion failure,

216 we assessed the peristaltic movement of late 3<sup>rd</sup> instar *Drosophila* larvae from caudal to rostral  
217 side (forward movement) in *201YGAL4>ChT<sup>RNAi</sup>* flies. We observed that peristaltic counts  
218 were drastically reduced when ChT was depleted in  $\alpha/\beta$ c neurons in *201YGAL4>ChT<sup>RNAi</sup>*  
219 ( $47\pm 0.99$  counts/min, N=40) as compared to their genetic controls *201YGAL4>+* ( $61\pm 0.80$   
220 contractions/min, N=40) (Fig. 4A). Transgenic over-expression of *ChT* in these neurons  
221 restored the peristaltic decrement ( $62.41\pm 2.02$  counts/min, N=40, Fig. 4A). To further clarify  
222 if the decrease in the peristaltic count is through the cholinergic mode of action and whether  
223 this process involves cholinergic proteins, we downregulated ChAT by expression of  
224 *ChAT<sup>RNAi</sup>* in  $\alpha/\beta$ c neurons. We did not observe any significant peristaltic decrease in  
225 *201YGAL4>ChAT<sup>RNAi</sup>* larvae ( $57.46\pm 1.25$  counts/min, N=40) (Fig. 4A). This suggests that the  
226 role of ChT is functionally uncoupled from ChAT in MB  $\alpha/\beta$ c neurons. Locomotion is one of  
227 the important behavior of an animal that largely depends on ACh (Rand, 2007). Therefore, we  
228 assessed the effect of ChT downregulation on peristalsis in cholinergic neurons also.  
229 Downregulation of *ChT* in cholinergic neurons reduces peristaltic count ( $43.46\pm 2.42$   
230 counts/min, N=40) as compared to their genetic control ( $60\pm 1.82$  counts/min, N=40) (Fig. 4B).  
231 This decrement in peristalsis is normalized by transgenic over-expression of *ChT* in cholinergic  
232 neurons ( $61\pm 1.91$  contractions/min, N=40) (Fig. 4B). Intriguingly, like in  $\alpha/\beta$ c neurons,  
233 depletion of *ChAT* by *ChAT<sup>RNAi</sup>* in cholinergic neurons also does not reduce peristaltic counts  
234 ( $60.13\pm 0.89$  counts/min) as compared to their genetic control (Fig. 4B). However, we observed  
235 a developmental delay by 3-4 days at 29 °C on knockdown of ChAT in cholinergic neurons as  
236 compared to their genetic controls. Taken together, these observations suggest that ChT can  
237 have cellular roles independent of the canonical cholinergic pathway.

238

239

## 240 **ChT function in MB $\alpha/\beta$ core neurons contributes to NMJ maintenance**

241 Proteins like *Drosophila* neurexins (DNRx), Scribble and RanBPM have been shown to be  
242 present in MB and are also associated with NMJ phenotype (Rui et al., 2017; Scantlebury et  
243 al., 2010). Therefore, we determined if the locomotor defect caused by downregulation of ChT  
244 in  $\alpha/\beta$  neurons could be due to alteration in NMJ morphology. We knocked down *ChT* in  $\alpha/\beta$   
245 neurons and assessed NMJ morphology in 3<sup>rd</sup> Instar larvae. We found a significant increase in  
246 the number of boutons per muscle area at the NMJs of *201Y>ChT<sup>RNAi</sup>* ( $1.65 \pm 0.06$ , N=16) as  
247 compared to their genetic control, *201Y>+* ( $1.32 \pm 0.03$ , N=16) (Fig. 5 A-B and F). There was  
248 also an increase in the number of branches in *201Y>ChT<sup>RNAi</sup>* ( $10 \pm 0.85$ , N=16) as compared to  
249 the genetic control ( $5 \pm 0.57$ , N=16) (Fig. 5 A-B and G). This phenotype was significantly  
250 rescued by transgenic over-expression of *ChT* in  $\alpha/\beta$  neurons (Boutons,  $1.34 \pm 0.05$ , N=10; no.  
251 of branches,  $8.5 \pm 0.42$ , N=11) (Fig. 5 C and H-I). Interestingly, downregulation of ChT in  
252 cholinergic neurons of *ChATGAL4>ChT<sup>RNAi</sup>* larvae did not show any significant alteration in  
253 bouton number ( $1.09 \pm 0.07$ , N=10) as well as a number of branches ( $8.5 \pm 0.83$ , N=10) as  
254 compared to the controls (Boutons,  $1.05 \pm 0.06$ ; no. of branches,  $6.5 \pm 0.37$ ) (Fig. D-G).  
255 Therefore, we propose that peristaltic count decrement due to ChT knockdown in  $\alpha/\beta$  neurons  
256 may be due to improper NMJ functioning that involves a non-cholinergic pathway for its  
257 maintenance. Its decrement in cholinergic neurons affecting peristalsis could be through a  
258 different mode of action that involves cholinergic pathway. However, the mechanisms by  
259 which ChT controls larval peristaltic movement through a pathway that does not require ChAT  
260 in MB  $\alpha/\beta$  as well as in cholinergic neurons requires further investigation. Together these  
261 results further corroborate our observations that ChT function in  $\alpha/\beta$  neurons is independent  
262 of the cholinergic pathway.

263

264 **Discussion:**

265 In the present study, we report that ChT is ubiquitously present in MB and its presence in a  
266 specific subset of MB neurons called  $\alpha/\beta$ c neurons is important for eclosion from pupae of *D.*  
267 *melanogaster*, locomotory behavior, and maintenance of NMJ integrity. Here, we present  
268 evidence that the role of ChT in MB  $\alpha/\beta$ c neurons is functionally uncoupled from the  
269 cholinergic locus. Together our results suggest that ChT can affect different downstream  
270 functional pathways which can be either cholinergic or non-cholinergic. Our findings thus  
271 establish a new avenue for ChT study, that, it is merely not an integral protein of the cholinergic  
272 cycle but also has other potential biological functions.

273  $\alpha/\beta$ c neurons are the last formed subset of neurons of  $\alpha/\beta$  lobes which are formed between the  
274 late pupal stage until adult eclosion (Strausfeld et al., 2003). Our observations that pupal  
275 lethality was seen only when ChT was downregulated in  $\alpha/\beta$ c but not in  $\alpha/\beta$ p,  $\alpha/\beta$ s neurons of  
276  $\alpha/\beta$  lobe or in  $\alpha'/\beta'$  lobe suggests that ChT plays distinct functional roles in different subsets  
277 of MB neurons. We do not observe any defect in the organization of the MB lobes on  
278 downregulation of ChT suggesting that it does not have a role in the organization of axonal  
279 fibers in these lobes. It is worth mentioning here that ChT knock out mice also showed neonatal  
280 lethality while the gross organ development and morphology of the pups were normal  
281 (Ferguson et al., 2004). This is closely similar to our observations of eclosion failure and  
282 consequent pupal lethality in *Drosophila* due to knock down of ChT. One possible cause of  
283 eclosion failure may be the altered NMJs that are observed due to knock down of ChT. The  
284 underlying mechanism of how ChT in  $\alpha/\beta$ c neurons affects NMJ morphology is currently  
285 unclear. However, like ChT, several other proteins, namely; *Drosophila* Neurexins, Scribble,  
286 adaptor protein DRK and Wallenda have also been reported to have localisation in MB and  
287 play a role in maintaining structural plasticity at NMJs via different signalling cascades  
288 (Moressis et al., 2009; Rui et al., 2017; Shin and DiAntonio, 2011). Previous reports also

289 describe that MB physiology regulates locomotor activity rhythms in *Drosophila* (Gorostiza et  
290 al., 2014; Mabuchi et al., 2016). Future studies are required to elucidate the potential  
291 downstream circuit that links the role of ChT in MB physiology and MB motor output.

292 For an efficient cholinergic neurotransmission, all the components of the ACh metabolic cycle  
293 should be present at the synaptic junctions. While there is a predominant expression of ChT in  
294 MB, our immunostaining analysis shows that ChAT and VAcHT are either absent or present  
295 in a negligible amount in MB which is undetectable at endogenous levels. In the current study,  
296 we provide multiple evidences that support non-canonical functions of ChT in  $\alpha/\beta$ c neurons:  
297 the downregulation of ChT but not ChAT or VAcHT in  $\alpha/\beta$ c neurons of MB causes eclosion  
298 failure suggesting that ChT regulate eclosion through a pathway that is functionally uncoupled  
299 from the cholinergic locus. Vice-versa, ChT knockdown in cholinergic neurons does not  
300 produce eclosion failure suggesting that  $\alpha/\beta$ c neurons are non-cholinergic. These observations  
301 corroborate the idea that ChT can have a non-canonical functional role at least in  $\alpha/\beta$ c neurons.  
302 Our assertion of the non-canonical role of ChT in MB is further supported by our observations  
303 that ChT knockdown in  $\alpha/\beta$ c neurons leads to altered phenotype at NMJs showing increased  
304 boutons and branch number. This phenotype was not observed when ChT was downregulated  
305 in cholinergic neurons. Furthermore, we see a reduction of peristaltic count on knockdown of  
306 ChT but not by ChAT in  $\alpha/\beta$ c neurons. Indeed, in NSC-19 cells expression of cholinergic locus  
307 and ChT was reported to be differentially regulated (Brock et al., 2007). Although we did not  
308 detect ChAT and VAcHT in MB but our data do not rule out any non-cell autonomous function  
309 of ACh affecting  $\alpha/\beta$  lobe functioning.

310 Alternatively, ChT in MB may regulate different functions through an indirect downstream  
311 pathway. Chromatin remodelers like histone acetyltransferase (HAT) and Histone deacetylase  
312 (HDAC4) are dependent on the levels of choline (Ward et al., 2013) . They also act as regulators  
313 of transcription factors like *D-Mef2* in *Drosophila* MB (Fitzsimons et al., 2013; Fogg et al.,

314 2014) and *FOXP3* in mammals (Li and Greene, 2007) . *FOXP* is present in MB and has been  
315 associated with locomotor defects and memory deficits (DasGupta et al., 2014) . Indeed, we  
316 observed similar eclosion failure when we knocked down ChT with Mef2GAL4 (data not  
317 shown). In the context of our observations, it is possible that ChT in  $\alpha/\beta$ c neurons is required  
318 for the uptake of choline into these neurons, not for ACh synthesis but different regulatory  
319 pathway involved in developmental and behavioral processes. This could be the possible reason  
320 that we see eclosion failure and locomotory defects due to ChT knockdown but not by reduction  
321 of cholinergic proteins. Thus, we propose that ChT maintains required levels of choline in  $\alpha/\beta$ c  
322 neurons for different downstream processes other than ACh synthesis.

323 Our findings have important implication in redefining the biological role of ChT to affect  
324 downstream pathway which may not be cholinergic. We speculate that ChT may be present in  
325 the cell types that require a high amount of choline and not just cells that synthesize ACh. Thus,  
326 we anticipate that the role of ChT is much far-reaching than previously thought. Although  
327 neuroanatomy of flies and vertebrates are quite distinct but the proteins of cholinergic signaling  
328 pathway are highly conserved. We believe that it will encourage further investigation into the  
329 developmental role of ChT as well as the role it plays in learning and memory in both  
330 invertebrates and higher organisms.

331

332

333

334

335

336

## 337 **Material and methods:**

### 338 *Drosophila stocks and culture conditions:*

339 All *Drosophila* stocks and their crosses were grown on standard cornmeal/agar media  
340 supplemented with yeast at 25 °C, under a 12-12 hr light-dark cycle. All crosses for RNAi  
341 experiments were grown at 29 °C. For all control experiments, GAL4 drivers were crossed with  
342 w<sup>1118</sup> (+) were used, unless otherwise mentioned in the experiments. The UASRNAi strains for  
343 ChT (101485), VAcHT (32848) were obtained from Vienna *Drosophila* RNAi Center  
344 (VDRC), Vienna, Austria and for ChAT (25856) was obtained from Bloomington stock center,  
345 Bloomington, Indiana. The GAL4 drivers used were *Elav*<sup>C155</sup>GAL4 (458), *Chat*GAL4 (6798),  
346 *201YGAL4* (4440), *MB247GAL4* (50742), *c305aGAL4* (30829).

### 347 *Cloning and generation of anti-ChT polyclonal antibody:*

348 cDNA fragment corresponding to the hydrophilic ChT C-terminal domain (Glu-489 to Phe-  
349 614) was amplified by PCR using two oligonucleotide primers  
350 5'AAGGATCCATGGAGTCCGGCAAGTTGCCGCCCA3' and  
351 5'AAAAGCTTTCAGAAGGCCGTATTGTCCT 3'. The amplified fragment was inserted into  
352 the BamHI/HindIII site of the pGEX-KG fusion protein expression vector. The fusion protein  
353 was purified and the protein domain was later cleaved from the glutathione S-transferase by  
354 incubation with thrombin overnight at 10°C followed by SDS-polyacrylamide gel  
355 electrophoresis to assess the extent of cleavage. The cleaved fragment was eluted and used for  
356 immunizing rabbits. About 250 µg of protein was used for the first immunization. For each  
357 booster doses (6x) 100 µg was used (Deshpande laboratories, Bhopal, India). The antibody  
358 from serum was later affinity purified before use.

### 359 *Generation of UAS-ChT transgenic line:*

360 The open reading frame of ChT was amplified from cDNA using a gene-specific forward  
361 primer (5'AAGAATTCATGATCAATATCGCTGGCG-3') and reverse primer  
362 (5'AAGCGGCCGCTCAGAAGGCCGTATTGTCCT3'). The amplified fragment was cloned  
363 between EcoRI and NotI site of the pUAS vector and injected into *Drosophila* embryos for  
364 transgenesis.

### 365 *Antibodies and immunohistochemistry of larval and adult brain:*

366 The primary antibodies used were: rabbit anti-ChT (1:300, this study), mouse anti-ChAT  
367 (1:1000, 4B1, DSHB), mouse anti-CSP (1:20, DSHB), anti-VACHT (1:200, a gift from  
368 Toshihiro Kitamoto, U. Iowa, Iowa City, IA). Conjugated secondary antibodies used were  
369 Alexa Fluor-568 (Molecular Probes), Alexa Fluor 647 (Jackson ImmunoResearch).

370 For immunohistochemistry, third instar larvae were age-matched and dissected in PBS as  
371 previously described (Baqri et al., 2006). For the adult brain, flies were anesthetized on ice and  
372 brain tissue was dissected out in cold PBS. Subsequently, tissues were fixed with freshly  
373 prepared 4% paraformaldehyde for 1.5 hr, washed and incubated with primary antibody at 4°C  
374 overnight. Following day, the tissues were incubated with secondary antibodies for 1.5 hr at  
375 room temperature, washed and finally mounted in vecatashield in between the bridge prepared  
376 by double sided tape in order to avoid squashing of tissue directly under the coverslip. All  
377 images were collected using Leica SP8 LSCM using oil immersion 63x/1.4 N.A objective and  
378 subsequently processed using Image J 1.50i (NIH, USA). Pupal images were taken using Zeiss  
379 Axiocam ERC 5S mounted on Zeiss Stemi2000 CS stereomicroscope.

380 For antibody quantification, three rectangular ROI of 50 X 50-pixel size was drawn over the  
381  $\alpha/\beta$  lobe. The mean fluorescence in the three ROI in  $\alpha/\beta$  lobe ( $I_{\alpha/\beta}$ ) was calculated using Image  
382 J. The  $\alpha/\beta$  lobe intensity was normalized with respect to mean fluorescence intensity of the  
383 three ROI of 50 X 50-pixel size in the neuropilar area outside MB ( $I_{ON}$ ).



384 ***Estimation of eclosion failure:***

385 Crosses were set between 4-5 days old males and virgin females in the ratio of 4:8 and left  
386 overnight at 29°C. Following day, the first vial was discarded and flies were subsequently  
387 transferred to new ones with fresh media, every 24 hours, for the next seven days. For each day  
388 number of total pupae developed and empty pupal cases were counted. Pupal lethality was  
389 scored on the basis of percentage eclosion calculated by [(Number of empty pupae/Total  
390 number of pupae) X100]. The quantitative and statistical analysis was performed in Sigma Plot  
391 ver. 12.5. One-way ANOVA followed by *post-hoc* Tukey test for pairwise comparison was  
392 used.

393 ***Peristalsis assay:***

394 Peristalsis assay was done manually on 15 cm petridish containing 2% hardened agar. Larvae  
395 were washed and kept on the plate for 1 min acclimatization. Subsequently, the peristaltic  
396 contractions were counted for 1 min under a dissection microscope. Full posterior to the  
397 anterior movement was counted as one contraction. The larvae which did not move were not  
398 considered in the analysis. The quantitative and statistical analysis was performed in Sigma  
399 Plot ver. 12.5. One-way ANOVA followed by *post-hoc* Tukey test for pairwise comparison  
400 was used.

401 ***Climbing assay:***

402 To determine the climbing activity of the flies, the assay vial was prepared by vertically joining  
403 two empty polystyrene vials with open ends facing each other. The vertical distance was  
404 marked at 6 cm above the bottom surface. A group of 10 flies irrespective of the gender was  
405 transferred to fresh vials for 24 hours. For the assay, flies were transferred into the assay vial  
406 and allowed to acclimatize for 30 minutes. The flies were then gently tapped down to the  
407 bottom of the vial and the number of flies that climb above the 6 cm mark was counted. For

408 each vial three trial readings were taken, allowing for 1 min rest in between each trial. A total  
409 of 12 groups were assayed for each genotype. The quantitative and statistical analysis was  
410 performed in Sigma Plot ver. 12.5. One-way ANOVA followed by *post-hoc* Tukey test for  
411 pairwise comparison was used.

#### 412 ***Immunohistochemistry and morphological quantification of NMJs:***

413 Third instar larvae were dissected in the calcium-free HL-3 buffer and fixed in 4%  
414 paraformaldehyde for 30 min. Subsequently, larvae were washed with 1X PBS, 0.2% Triton  
415 X-100 and blocked in 5% BSA for 1 hour. Incubation of larval fillets was done overnight at  
416 4°C in primary antibody and then with secondary antibodies for one and half hour at room  
417 temperature and mounted in Flourmount G (Southern Biotech). Antibodies used were mouse  
418 anti-CSP (ab49- DSHB) in 1:50 and Alexa 488 conjugated anti-HRP in 1:800 (Molecular  
419 Probes). Species-specific fluorophore conjugated secondary antibody used was Alexa 568 in  
420 1:800 dilution.

421 Morphological quantification of NMJ was performed at muscle 6/7 in the A2 hemisegment.  
422 For quantification of different parameters of NMJ, morphology images were captured at 40X  
423 objective in Olympus FV3000. Image J (NIH) and cellSens software were used for muscle area  
424 and Bouton number. Bouton number was normalized to respective muscle area. A total number  
425 of branches were quantified as described earlier (Coyle et al., 2004). Statistical analysis was  
426 done by using students t-test and non-parametric Mann-Whitney rank sum test where the  
427 normality test failed. All data values indicate mean and standard error mean.

428

429

430

431 **Acknowledgements:**

432 We acknowledge Department of Science & Technology, Govt. of India for financial support to  
433 R.H vide reference no. SR/WOS-A/LS-77/2013 under Women Scientist Scheme-A to carry out  
434 this work. We acknowledge Indian Institute of Science Education and Research, Bhopal  
435 (IISER-B) for hosting R.H during initial tenure of the project. We thank Toshihiro Kitamoto,  
436 for providing *anti-VChT* antibody, Bloomington Drosophila Stock Center (BDSC), Indiana  
437 USA and Vienna Drosophila RNAi Centre (VDRC), Austria for fly stocks. We also thank  
438 Krishanu Ray and Manish Jaiswal for many useful comments on the manuscript.

439 **Author contribution:**

440 R.H conceived the project, designed and performed most of the experiments. N.H performed  
441 eclosion estimation, climbing assays with assistance from R.H. S.K performed NMJ  
442 experiments. S.S. performed peristalsis assay. R.H analysed and interpreted the results with  
443 critical inputs from N.H. R.H compiled the figures and wrote the paper. V.K provided resources  
444 for antibody and transgenic flies generation. V.K and R.K.M gave scientific inputs, editing,  
445 critical comments and provided resources.

446 **Competing interests:** The authors declare no competing or financial interest in publishing  
447 this paper.

448 **Reagent availability:** All the reagents generated and used in the manuscript will be shared  
449 with the scientific community.

450

451

452

453 **References:**

- 454 **Apparsundaram, S., Ferguson, S.M., Blakely, R.D., (2001).** Molecular cloning and  
455 characterization of a murine hemicholinium-3-sensitive choline transporter. *Biochem Soc*  
456 *Trans* 29, 711-716.
- 457 **Apparsundaram, S., Ferguson, S.M., George, A.L., Jr., Blakely, R.D., (2000).** Molecular  
458 cloning of a human, hemicholinium-3-sensitive choline transporter. *Biochem Biophys Res*  
459 *Commun* 276, 862-867.
- 460 **Aso, Y., Grubel, K., Busch, S., Friedrich, A.B., Siwanowicz, I., Tanimoto, H., (2009).** The  
461 mushroom body of adult *Drosophila* characterized by GAL4 drivers. *J Neurogenet* 23, 156-  
462 172.
- 463 **Baqri, R., Charan, R., Schimmelpfeng, K., Chavan, S., Ray, K., (2006).** Kinesin-2  
464 differentially regulates the anterograde axonal transports of acetylcholinesterase and choline  
465 acetyltransferase in *Drosophila*. *J Neurobiol* 66, 378-392.
- 466 **Barnstedt, O., Oswald, D., Felsenberg, J., Brain, R., Moszynski, J.P., Talbot, C.B., Perrat,**  
467 **P.N., Waddell, S., (2016).** Memory-Relevant Mushroom Body Output Synapses Are  
468 Cholinergic. *Neuron* 89, 1237-1247.
- 469 **Barwick, K.E., Wright, J., Al-Turki, S., McEntagart, M.M., Nair, A., Chioza, B., Al-**  
470 **Memar, A., Modarres, H., Reilly, M.M., Dick, K.J., Ruggiero, A.M., Blakely, R.D.,**  
471 **Hurles, M.E., Crosby, A.H., (2012).** Defective presynaptic choline transport underlies  
472 hereditary motor neuropathy. *Am J Hum Genet* 91, 1103-1107.
- 473 **Bissette, G., Seidler, F.J., Nemeroff, C.B., Slotkin, T.A., (1996).** High affinity choline  
474 transporter status in Alzheimer's disease tissue from rapid autopsy. *Ann N Y Acad Sci* 777,  
475 197-204.

- 476 **Brock, M., Nickel, A.C., Madziar, B., Blusztajn, J.K., Berse, B., (2007).** Differential  
477 regulation of the high affinity choline transporter and the cholinergic locus by cAMP signaling  
478 pathways. *Brain Res* 1145, 1-10.
- 479 **Brooks, E.S., Greer, C.L., Romero-Calderon, R., Serway, C.N., Grygoruk, A., Haimovitz,**  
480 **J.M., Nguyen, B.T., Najibi, R., Tabone, C.J., de Belle, J.S., Krantz, D.E., (2011).** A putative  
481 vesicular transporter expressed in *Drosophila* mushroom bodies that mediates sexual behavior  
482 may define a neurotransmitter system. *Neuron* 72, 316-329.
- 483 **Chang, H.Y., Grygoruk, A., Brooks, E.S., Ackerson, L.C., Maidment, N.T., Bainton, R.J.,**  
484 **Krantz, D.E., (2006).** Overexpression of the *Drosophila* vesicular monoamine transporter  
485 increases motor activity and courtship but decreases the behavioral response to cocaine. *Mol*  
486 *Psychiatry* 11, 99-113.
- 487 **Coyle, I.P., Koh, Y.H., Lee, W.C., Slind, J., Fergestad, T., Littleton, J.T., Ganetzky, B.,**  
488 **(2004).** Nervous wreck, an SH3 adaptor protein that interacts with Wsp, regulates synaptic  
489 growth in *Drosophila*. *Neuron* 41, 521-534.
- 490 **Daniels, R.W., Gelfand, M.V., Collins, C.A., DiAntonio, A., (2008).** Visualizing  
491 glutamatergic cell bodies and synapses in *Drosophila* larval and adult CNS. *J Comp Neurol*  
492 508, 131-152.
- 493 **DasGupta, S., Ferreira, C.H., Miesenbock, G., (2014).** FoxP influences the speed and  
494 accuracy of a perceptual decision in *Drosophila*. *Science* 344, 901-904.
- 495 **Durkin, T.P., (1994).** Spatial working memory over long retention intervals: dependence on  
496 sustained cholinergic activation in the septohippocampal or nucleus basalis magnocellularis-  
497 cortical pathways? *Neuroscience* 62, 681-693.
- 498 **Fei, H., Chow, D.M., Chen, A., Romero-Calderon, R., Ong, W.S., Ackerson, L.C.,**  
499 **Maidment, N.T., Simpson, J.H., Frye, M.A., Krantz, D.E., (2010).** Mutation of the

500 *Drosophila* vesicular GABA transporter disrupts visual figure detection. *J Exp Biol* 213, 1717-  
501 1730.

502 **Ferguson, S.M., Bazalakova, M., Savchenko, V., Tapia, J.C., Wright, J., Blakely, R.D.,**  
503 **(2004).** Lethal impairment of cholinergic neurotransmission in hemicholinium-3-sensitive  
504 choline transporter knockout mice. *Proc Natl Acad Sci U S A* 101, 8762-8767.

505 **Fitzsimons, H.L., Schwartz, S., Given, F.M., Scott, M.J., (2013).** The Histone Deacetylase  
506 HDAC4 Regulates Long-Term Memory in *Drosophila*. *Plos One* 8.

507 **Fogg, P.C., O'Neill, J.S., Dobrzycki, T., Calvert, S., Lord, E.C., McIntosh, R.L., Elliott,**  
508 **C.J., Sweeney, S.T., Hastings, M.H., Chawla, S., (2014).** Class IIa histone deacetylases are  
509 conserved regulators of circadian function. *J Biol Chem* 289, 34341-34348.

510 **Gorczyca, M.G., Hall, J.C., (1987).** Immunohistochemical localization of choline  
511 acetyltransferase during development and in *Chats* mutants of *Drosophila melanogaster*. *J*  
512 *Neurosci* 7, 1361-1369.

513 **Gorostiza, E.A., Depetris-Chauvin, A., Frenkel, L., Pirez, N., Ceriani, M.F., (2014).**  
514 Circadian pacemaker neurons change synaptic contacts across the day. *Curr Biol* 24, 2161-  
515 2167.

516 **Kimura, K.I., Truman, J.W., (1990).** Postmetamorphic cell death in the nervous and  
517 muscular systems of *Drosophila melanogaster*. *J Neurosci* 10, 403-401.

518 **Kuhar, M.J., Murrin, L.C., (1978).** Sodium-dependent, high affinity choline uptake. *J*  
519 *Neurochem* 30, 15-21.

520 **Lee, T., Lee, A., Luo, L., (1999).** Development of the *Drosophila* mushroom bodies: sequential  
521 generation of three distinct types of neurons from a neuroblast. *Development* 126, 4065-4076.

522 **Li, B., Greene, M.I., (2007).** FOXP3 actively represses transcription by recruiting the  
523 HAT/HDAC complex. *Cell Cycle* 6, 1432-1436.

- 524 **Lockman, P.R., Allen, D.D., (2002).** The transport of choline. *Drug Dev Ind Pharm* 28, 749-  
525 771.
- 526 **Mabuchi, I., Shimada, N., Sato, S., Ienaga, K., Inami, S., Sakai, T., (2016).** Mushroom body  
527 signaling is required for locomotor activity rhythms in *Drosophila*. *Neurosci Res* 111, 25-33.
- 528 **Matthies, D.S., Fleming, P.A., Wilkes, D.M., Blakely, R.D., (2006).** The *Caenorhabditis*  
529 *elegans* choline transporter CHO-1 sustains acetylcholine synthesis and motor function in an  
530 activity-dependent manner. *J Neurosci* 26, 6200-6212.
- 531 **Moressis, A., Friedrich, A.R., Pavlopoulos, E., Davis, R.L., Skoulakis, E.M., (2009).** A dual  
532 role for the adaptor protein DRK in *Drosophila* olfactory learning and memory. *J Neurosci* 29,  
533 2611-2625.
- 534 **O'Regan, S., Traiffort, E., Ruat, M., Cha, N., Compaore, D., Meunier, F.M., (2000).** An  
535 electric lobe suppressor for a yeast choline transport mutation belongs to a new family of  
536 transporter-like proteins. *Proc Natl Acad Sci U S A* 97, 1835-1840.
- 537 **Okuda, T., Haga, T., Kanai, Y., Endou, H., Ishihara, T., Katsura, I., (2000).** Identification  
538 and characterization of the high-affinity choline transporter. *Nat Neurosci* 3, 120-125.
- 539 **Pascual, J., Fontan, A., Zarranz, J.J., Berciano, J., Florez, J., Pazos, A., (1991).** High-  
540 affinity choline uptake carrier in Alzheimer's disease: implications for the cholinergic  
541 hypothesis of dementia. *Brain Res* 552, 170-174.
- 542 **Perrat, P.N., DasGupta, S., Wang, J., Theurkauf, W., Weng, Z., Rosbash, M., Waddell,  
543 S., (2013).** Transposition-driven genomic heterogeneity in the *Drosophila* brain. *Science* 340,  
544 91-95.
- 545 **Rand, J.B., (2007).** Acetylcholine. *WormBook*, 1-21.
- 546 **Rivlin, P.K., St Clair, R.M., Vilinsky, I., Deitcher, D.L., (2004).** Morphology and molecular  
547 organization of the adult neuromuscular junction of *Drosophila*. *J Comp Neurol* 468, 596-613.

548 **Rui, M., Qian, J., Liu, L., Cai, Y., Lv, H., Han, J., Jia, Z., Xie, W., (2017).** The neuronal  
549 protein Neurexin directly interacts with the Scribble-Pix complex to stimulate F-actin assembly  
550 for synaptic vesicle clustering. *J Biol Chem* 292, 14334-14348.

551 **Scantlebury, N., Zhao, X.L., Rodriguez Moncalvo, V.G., Camiletti, A., Zahanova, S.,**  
552 **Dineen, A., Xin, J.H., Campos, A.R., (2010).** The *Drosophila* gene *RanBPM* functions in the  
553 mushroom body to regulate larval behavior. *PLoS One* 5, e10652.

554 **Shin, J.E., DiAntonio, A., (2011).** *Highwire* regulates guidance of sister axons in the  
555 *Drosophila* mushroom body. *J Neurosci* 31, 17689-17700.

556 **Sinakevitch, I., Farris, S.M., Strausfeld, N.J., (2001).** Taurine-, aspartate- and glutamate-  
557 like immunoreactivity identifies chemically distinct subdivisions of Kenyon cells in the  
558 cockroach mushroom body. *J Comp Neurol* 439, 352-367.

559 **Sinakevitch, I., Grau, Y., Strausfeld, N.J., Birman, S., (2010).** Dynamics of glutamatergic  
560 signaling in the mushroom body of young adult *Drosophila*. *Neural Dev* 5, 10.

561 **Strausfeld, N.J., Sinakevitch, I., Vilinsky, I., (2003).** The mushroom bodies of *Drosophila*  
562 *melanogaster*: an immunocytological and golgi study of Kenyon cell organization in the  
563 calyces and lobes. *Microsc Res Tech* 62, 151-169.

564 **Toumane, A., Durkin, T., Marighetto, A., Jaffard, R., (1989).** The durations of hippocampal  
565 and cortical cholinergic activation induced by spatial discrimination testing of mice in an eight-  
566 arm radial maze decrease as a function of acquisition. *Behav Neural Biol* 52, 279-284.

567 **Wang, H., Salter, C.G., Refai, O., Hardy, H., Barwick, K.E.S., Akpulat, U., Kvarnung,**  
568 **M., Chioza, B.A., Harlalka, G., Taylan, F., Sejersen, T., Wright, J., Zimmerman, H.H.,**  
569 **Karakaya, M., Stuve, B., Weis, J., Schara, U., Russell, M.A., Abdul-Rahman, O.A.,**  
570 **Chilton, J., Blakely, R.D., Baple, E.L., Cirak, S., Crosby, A.H., (2017).** Choline transporter  
571 mutations in severe congenital myasthenic syndrome disrupt transporter localization. *Brain*  
572 140, 2838-2850.



- 573 **Wang, Y., Cao, Z., Newkirk, R.F., Ivy, M.T., Townsel, J.G., (2001).** Molecular cloning of  
574 a cDNA for a putative choline co-transporter from *Limulus* CNS. *Gene* 268, 123-131.
- 575 **Ward, C.S., Eriksson, P., Izquierdo-Garcia, J.L., Brandes, A.H., Ronen, S.M., (2013).**  
576 HDAC inhibition induces increased choline uptake and elevated phosphocholine levels in  
577 MCF7 breast cancer cells. *PLoS One* 8, e62610.
- 578 **Wenk, G., Hepler, D., Olton, D., (1984).** Behavior alters the uptake of [3H]choline into  
579 acetylcholinergic neurons of the nucleus basalis magnocellularis and medial septal area. *Behav*  
580 *Brain Res* 13, 129-138.
- 581 **Yasuyama, K., Kitamoto, T., Salvaterra, P.M., (1995).** Localization of choline  
582 acetyltransferase-expressing neurons in the larval visual system of *Drosophila melanogaster*.  
583 *Cell Tissue Res* 282, 193-202.
- 584

585

# Figure:1

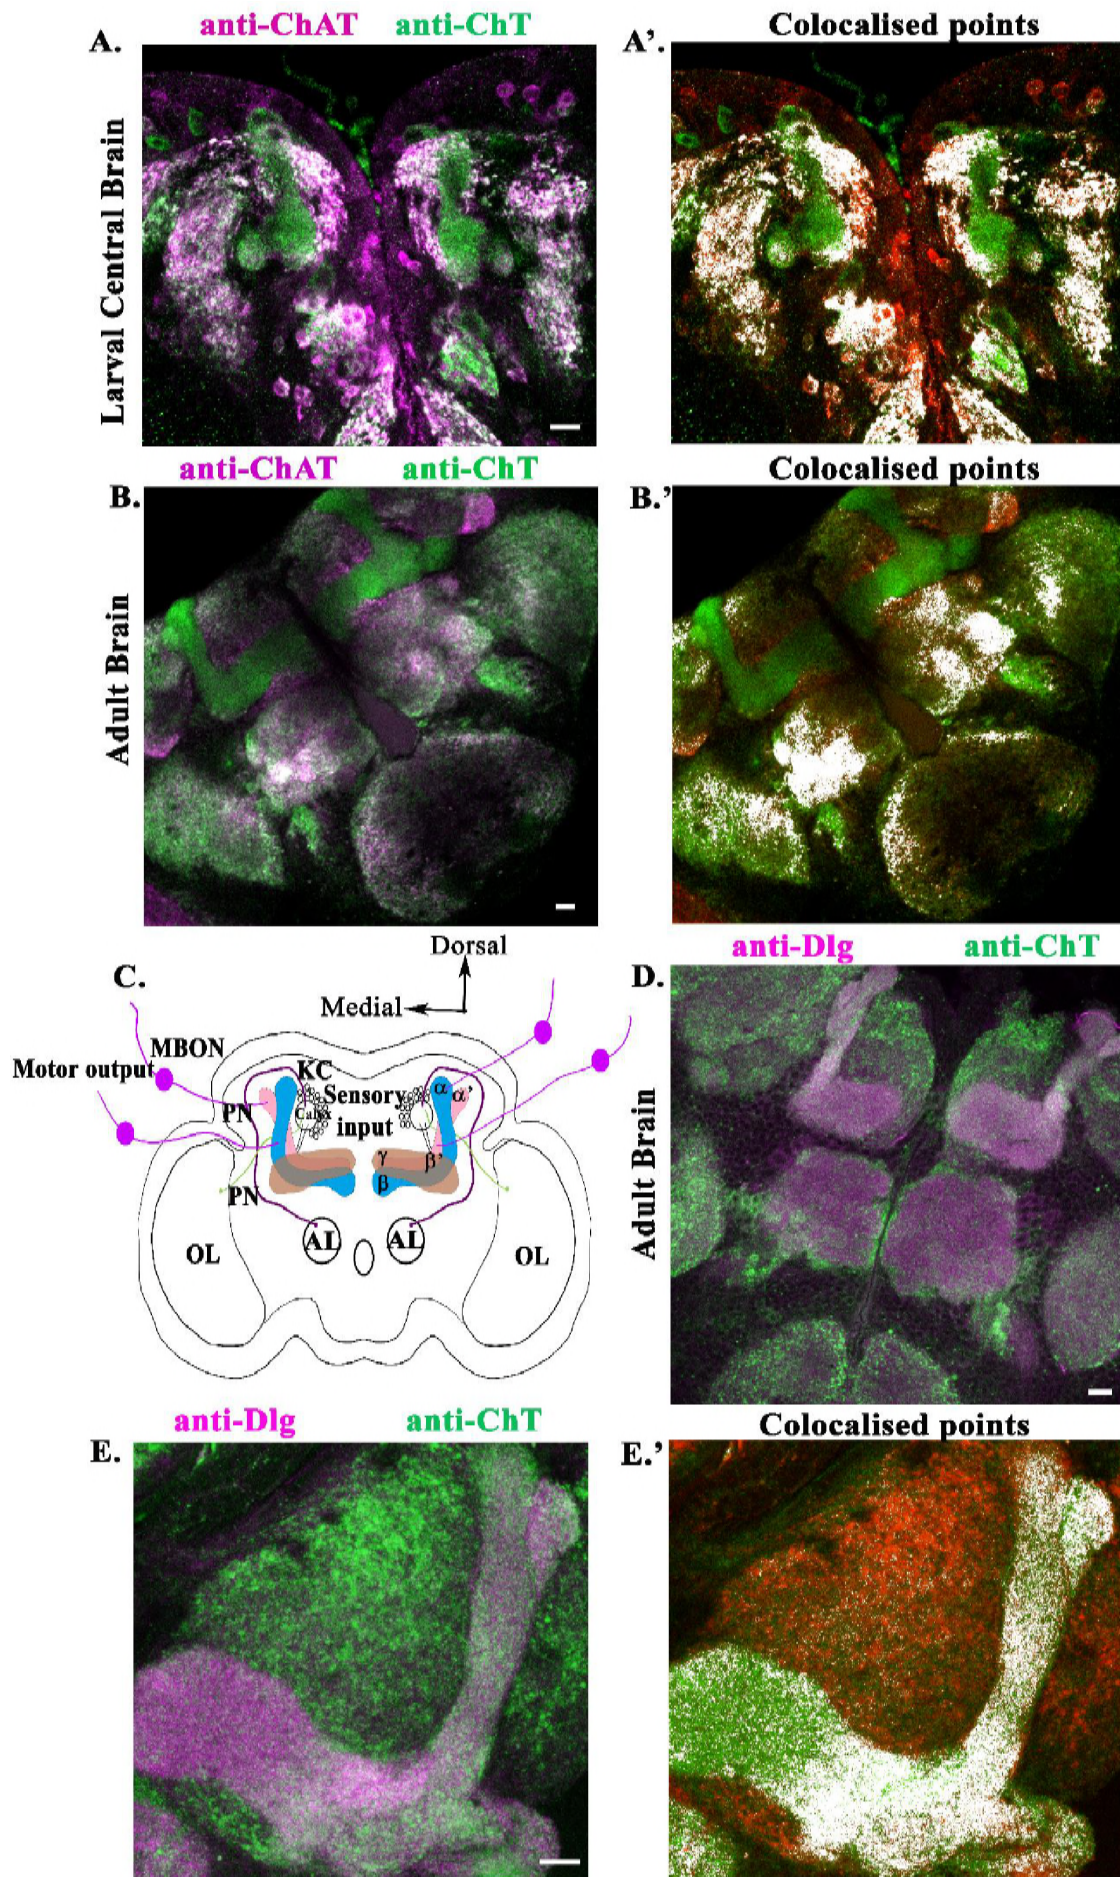

586

587 **Figure 1: ChT is expressed in MB of larval as well as adult *Drosophila* brain.**

588 (A) left panel, shows co-immunostaining of ChT and ChAT in the central brain of 3<sup>rd</sup> instar larva, colocalized  
589 regions are shown as white, (A') right panel represents the same image processed by image J showing the  
590 colocalized pixels as white. (B) shows co-immunostaining of ChT and ChAT in the dissected adult fly brain  
591 (colocalized regions, white). The L-shaped structures are MB. (B') shows colocalized pixels as white. (C),  
592 schematics of the fly adult brain showing MB and different neural processes in and out of it. MB circuitry is  
593 formed by a posterior cluster of about 2200-2500 Kenyon cells (KC) shown here as empty small circles. KC  
594 extend their dendritic processes to form calyx. Projection neurons (PN) from different sensory glomeruli  
595 project their axons into the MB calyx. Shown here are antennal lobe (AL) and optic lobe (OL) and  
596 representative PN coming out from them as magenta and green respectively. Axons of KCs form fasciculated  
597 axonal tract called peduncle which branches into lobes, bifurcating dorsally to form  $\alpha/\alpha'$  and medially  $\beta/\beta'$   
598 (shown as pink and blue lobes). A single  $\gamma$  lobe which is continuous with heel wraps  $\beta'$  lobe (shown as brown  
599 lobe). The MB lobes synapse with dendrites of Mushroom body output neurons (MBON) which provide the  
600 motor input and is the only output of MB (purple solid circle). (D) shows the co-immunostaining of Dlg and  
601 ChT protein in the adult *Drosophila* brain. (E) shows digitally zoomed image of Dlg and ChT co-  
602 immunostained single MB of the adult brain (left panel) and processed colocalized image (E'). All  
603 immunostained images are pseudocolored z-stack confocal images which are representative of 5-7 brains.  
604 Scale bar, 50  $\mu\text{m}$ .

605

606

607

608

609

610

611

612

613



614

## Figure 2:

615

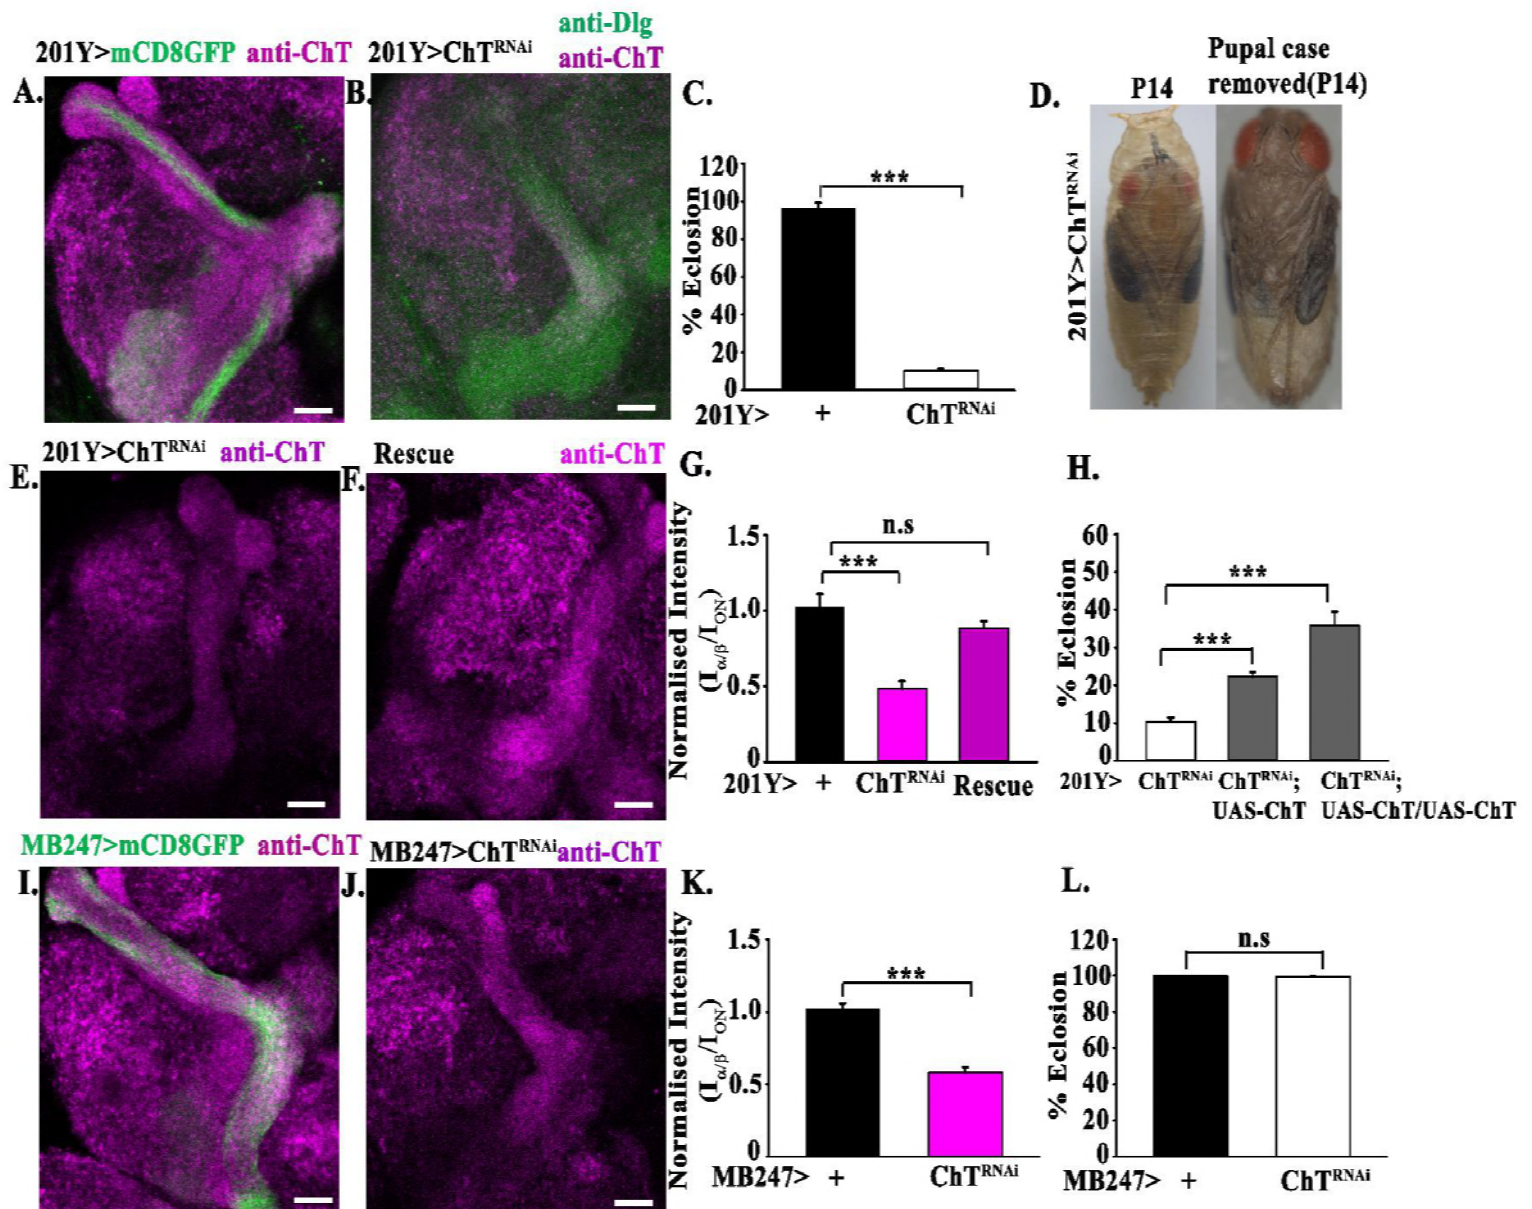

616

617

618

619

620

621

622

623

624

**Figure 2: Downregulation of ChT in  $\alpha/\beta$  neurons lead to eclosion failure which is rescued by**

***transgenic overexpression of ChT.***

(A) Shows mCD8GFP driven by 201YGAL4, marks  $\alpha/\beta$  neurons and  $\gamma$  lobe (green) and co-stained by anti-ChT (magenta) in MB lobe. (B) knockdown of ChT by ChT<sup>RNAi</sup> is driven by 201YGAL4 and coimmunostained with anti-ChT (purple) and anti-Dlg (green). (C) shows percent eclosion failure by knockdown of ChT in 201Y>ChT<sup>RNAi</sup> as compared to 201Y>+. (D) shows development in P14 staged undissected pupa (left) and fly dissected out from the pupal case (right) of 201Y>ChT<sup>RNAi</sup> genotype. (E) shows anti-ChT immunostained brain of 201Y>ChT<sup>RNAi</sup> flies dissected out from the pupal case. (F) shows anti-ChT immunostained brain of 201Y/ ChT<sup>RNAi</sup>;UAS-ChT/UAS-ChT flies rescued by overexpression of *ChT*. (G) Bar graphs showing quantification of E-F, anti-ChT fluorescence signal inside MB  $\alpha/\beta$  lobes ( $I_{\alpha/\beta}$ ) normalized to ChT signal in neuropilar areas outside MB lobes ( $I_{ON}$ ) in indicated genotypes. For rescue dissected adult brain from 201Y/ ChT<sup>RNAi</sup>;UAS-ChT/UAS-ChT was analyzed. (H) shows percent eclosion in 201Y/ ChT<sup>RNAi</sup>;UAS-ChT and 201Y/ ChT<sup>RNAi</sup>; UAS-ChT/UAS-ChT flies as compared to 201Y>ChT<sup>RNAi</sup> genotypes. (I) shows mCD8GFP (green) driven by MB247GAL4, marks  $\alpha/\beta$ s and  $\alpha/\beta$ p neurons and co-stained by anti-ChT (magenta) in MB lobe. (J) shows anti-ChT immunostained brain of MB247>ChT<sup>RNAi</sup> (K) shows anti-ChT fluorescence signal inside MB  $\alpha/\beta$  lobes ( $I_{\alpha/\beta}$ ) normalized to ChT signal in neuropilar areas outside MB lobes ( $I_{ON}$ ) and (L) shows percent eclosion in MB247>ChT<sup>RNAi</sup> compared to MB247>+. All images are z-stack pseudocolored representative of 5-7 adult brains. Error bars represent mean  $\pm$  SEM, \*\*\* represent  $p < 0.001$ . Statistical analysis is based on one-way ANOVA for pairwise comparison. Scale bar, 50  $\mu$ m

653

### Figure 3:

654

ChATGal4>mCD8GFP anti-ChT

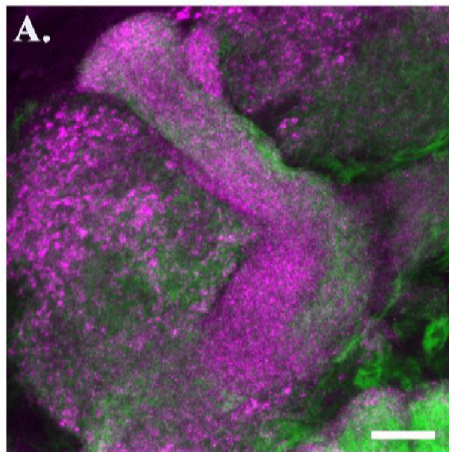

**B.**

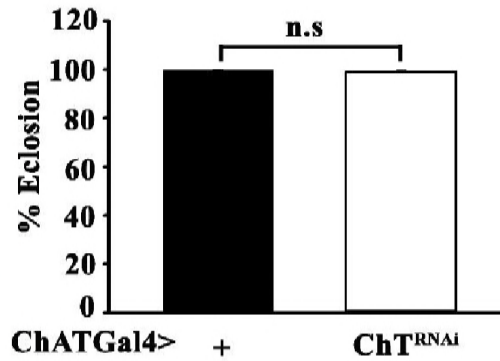

ChATGal4>ChT<sup>RNAI</sup> anti-ChT

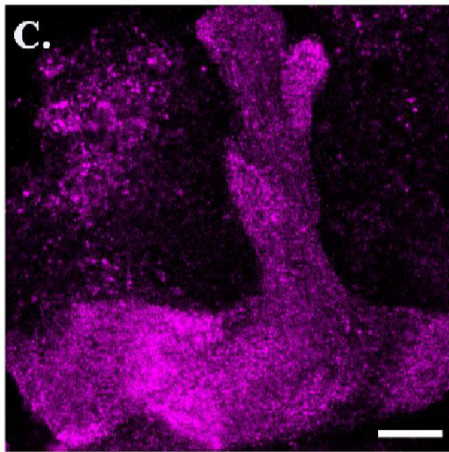

**D.**

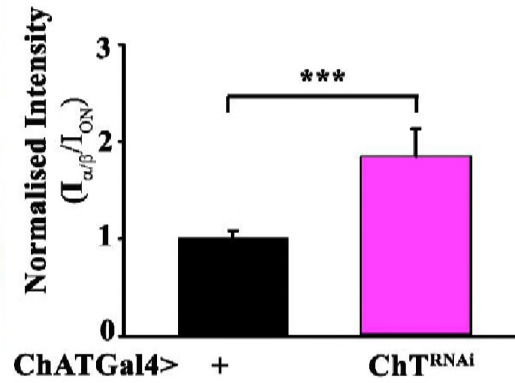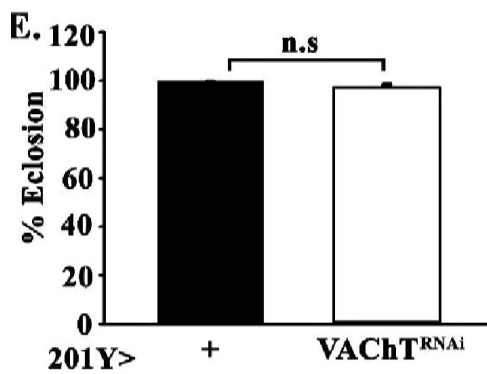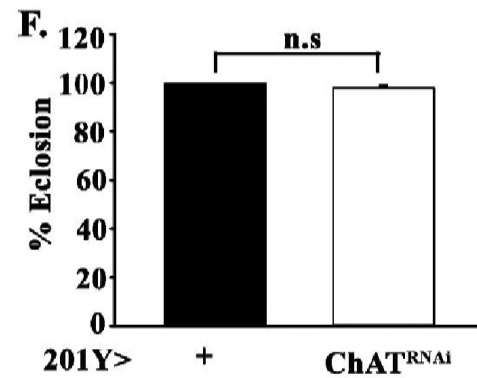

655

656

657

658

659

660

661

662 **Figure 3: Knockdown of ChT in cholinergic neurons and knock down of cholinergic locus proteins in**  
663 ***α/βc neurons do not cause eclosion failure***

664 (A) Shows mCD8GFP driven by ChATGAL4 that marks cholinergic neuropile (green) and co-stained by anti-  
665 ChT (magenta) in the MB lobe. (B) shows percent eclosion failure by knockdown of ChT in  
666 ChATGAL4>ChT<sup>RNAi</sup> as compared to ChATGAL4>+. (C) shows anti-ChT immunostained brain of  
667 ChATGAL4>ChT<sup>RNAi</sup> flies and (D) are bar graphs showing quantification of anti-ChT fluorescence signal  
668 inside MB  $\alpha/\beta$  lobes ( $I_{\alpha/\beta}$ ) normalized to ChT signal in neuropilar areas outside MB lobes ( $I_{ON}$ ) in indicated  
669 genotypes. (E and F) are percent eclosion by knockdown of ChAT and VChT in 201Y>ChAT<sup>RNAi</sup> and  
670 201Y>VChT<sup>RNAi</sup> as compared to 201Y>+. All images are a pseudocolored representative image of the 3-5  
671 adult brain. Error bars represent mean  $\pm$  SEM, \*\*\* represent  $p < 0.001$ . Statistical analysis is based on one-way  
672 ANOVA for pairwise comparison. Scale bar, 50  $\mu$ m

692 **Figure 4:**

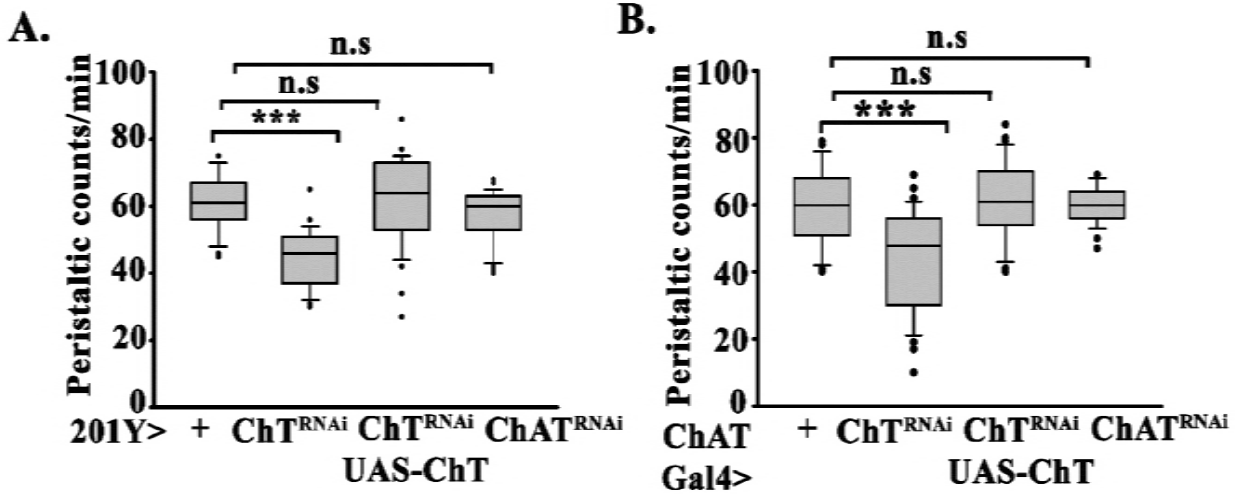

694 **Figure 4: Knockdown of ChT in  $\alpha/\beta_c$  neurons and cholinergic neurons alter the peristaltic behavior of**  
695 ***3<sup>rd</sup> instar larvae***

696 A and B show peristalsis quantified as a number of body wall contractions from posterior to anterior end and  
697 represented as peristaltic counts per min in the indicated genotypes. Distribution of data is shown as a box  
698 plot (n=40) for each genotype. The box plot show box boundaries as 25% and 75% quartiles and median as  
699 the center line. 10% and 90% quartiles are shown as whiskers. \*\*\* represent p<0.001 and n.s represent non-  
700 significance. Statistical analysis is based on one-way ANOVA for pairwise comparison. Kruskal Wallis one-  
701 way analysis on variance on ranks was done where the normality test fails.



710 **Table 1:**

711

| Genotypes                                    | Total no. of pupae | Pupae eclosed | % Eclosion±SEM |
|----------------------------------------------|--------------------|---------------|----------------|
| 201Y>+                                       | 1502               | 1436          | 96.49±2.76     |
| 201Y>ChT <sup>RNAi</sup>                     | 957                | 99            | 10.3±1.15      |
| 201Y>ChT <sup>RNAi</sup> ; UAS-ChT           | 1246               | 273           | 22.2±1.3       |
| 201Y/ ChT <sup>RNAi</sup> ; UAS-ChT/ UAS-ChT | 482                | 160           | 35.8±3.7       |
| 201Y>VChT <sup>RNAi</sup>                    | 495                | 484           | 97.46±1.09     |
| 201Y>ChAT <sup>RNAi</sup>                    | 711                | 694           | 97.92±1        |
| MB247>+                                      | 1558               | 1555          | 99.80±0.15     |
| MB247>ChT <sup>RNAi</sup>                    | 1374               | 1370          | 99.43±0.41     |
| C305a>+                                      | 812                | 764           | 95.09±2.28     |
| C305a>ChT <sup>RNAi</sup>                    | 419                | 407           | 96.12±1.99     |
| ChATGAL4>+                                   | 2878               | 2872          | 99.78±0.09     |
| ChATGAL4>ChT <sup>RNAi</sup>                 | 1740               | 1724          | 99.09±0.28     |

712

713

714 **Table 1:** Table summarising a total number of pupae analyzed in this study for eclosion failure due to knock  
715 down of ChT in a different subset of Kenyon cells and mushroom body lobes

716

717

718

719

720

721

722

723

724

725

726

727

728

729

730

## Figure 5:

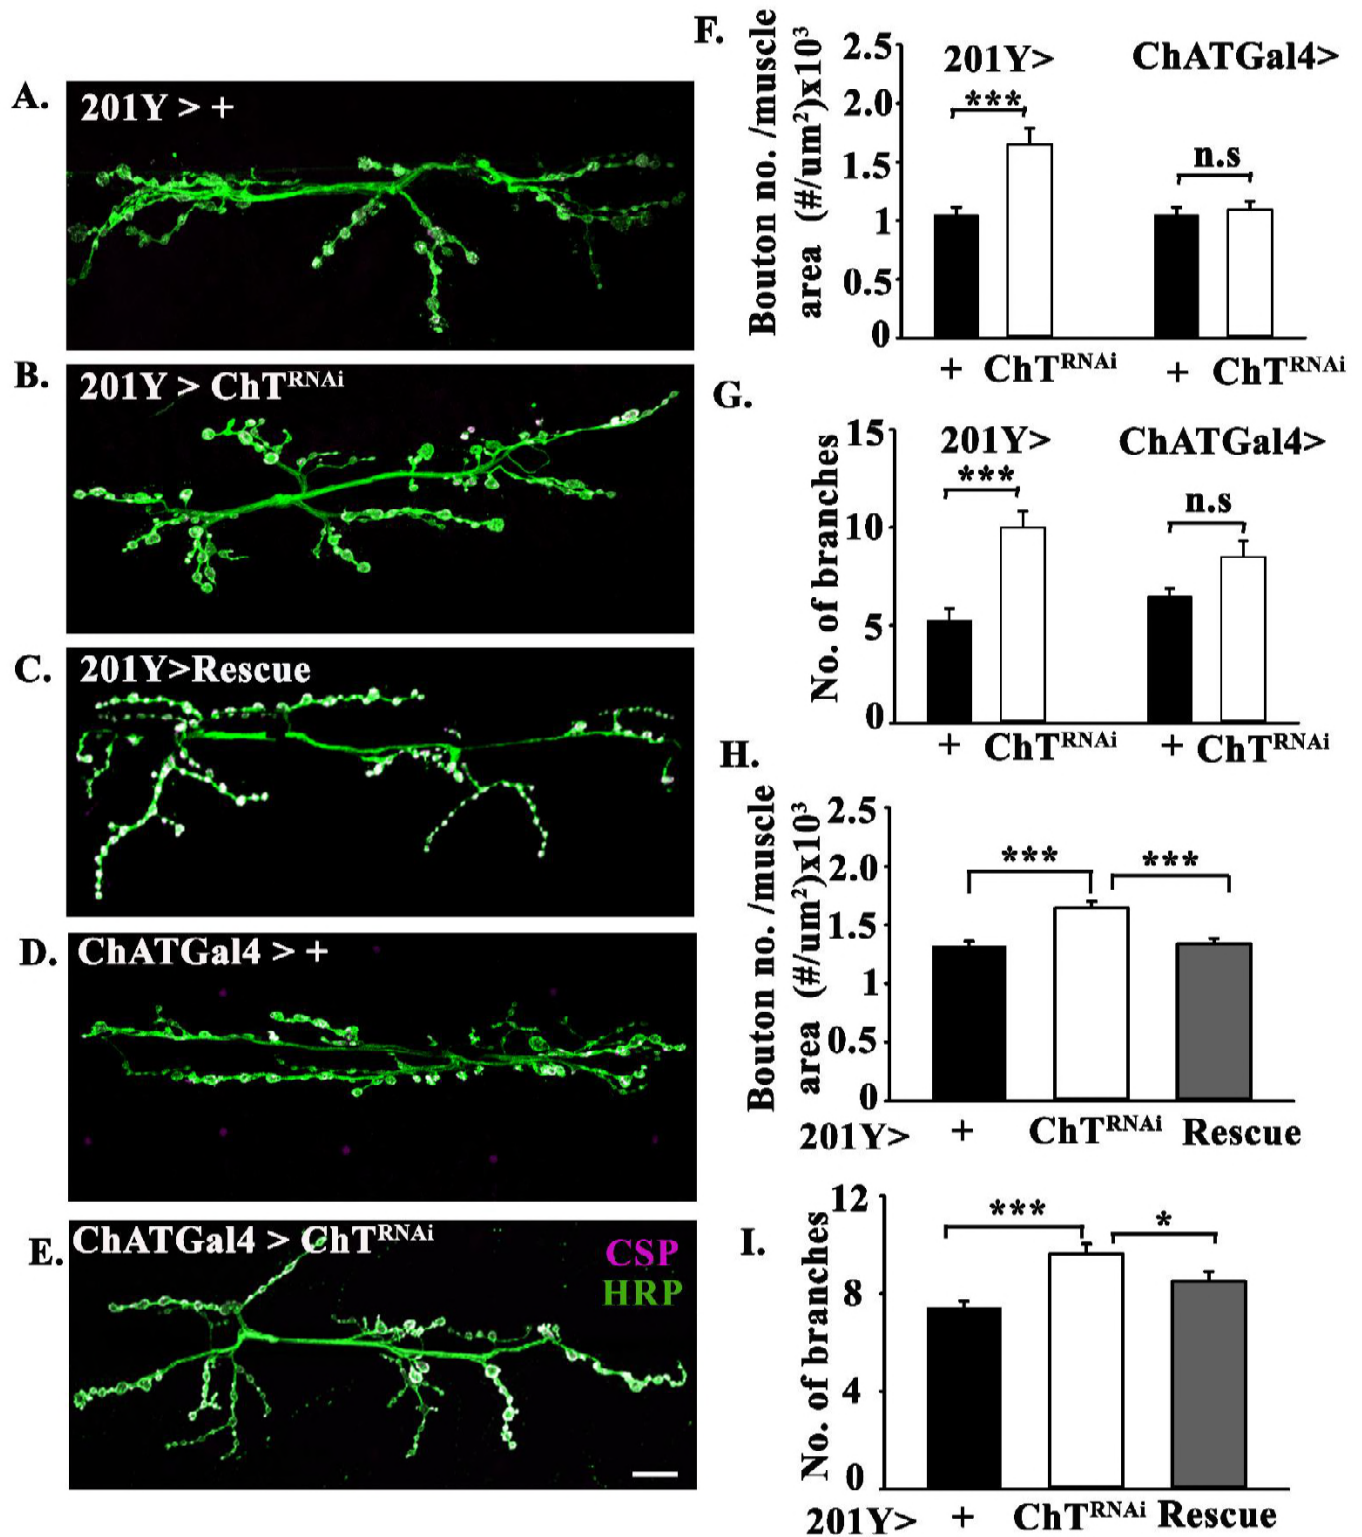

731

732

733

734

735

**Figure 5: Knockdown of ChT in  $\alpha/\beta_c$  neurons but not in cholinergic neurons alter NMJ phenotype in**

***3<sup>rd</sup> instar larvae***

Representative images of the given genotypes at muscle 6/7 of A2 hemisegment in 3<sup>rd</sup> instar larva; (A) 201Y>+, (B) 201Y>ChT<sup>RNAi</sup>, (C) 201Y/ChT<sup>RNAi</sup>; UAS-ChT/UAS-ChT (Rescue), (D) ChATGal4>+, (E) ChATGAL4>ChT<sup>RNAi</sup>. The NMJs shown were stained with anti-HRP (green) and anti-CSP (magenta). Scale bar in E represents 20  $\mu$ m. (F-I) Bar graphs showing number of boutons and the total number of branches per muscle area of 6/7 muscle of A2 hemisegment. Error bars represent mean  $\pm$  SEM; N= 12-17; \*\*\* represent  $p < 0.001$ ; \* represent  $p < 0.05$ . Statistical analysis was done using the two-tailed t-test and non-parametric Mann-Whitney rank sum test where the normality test failed.

763

## Supplementary figures

764

Figure S1:

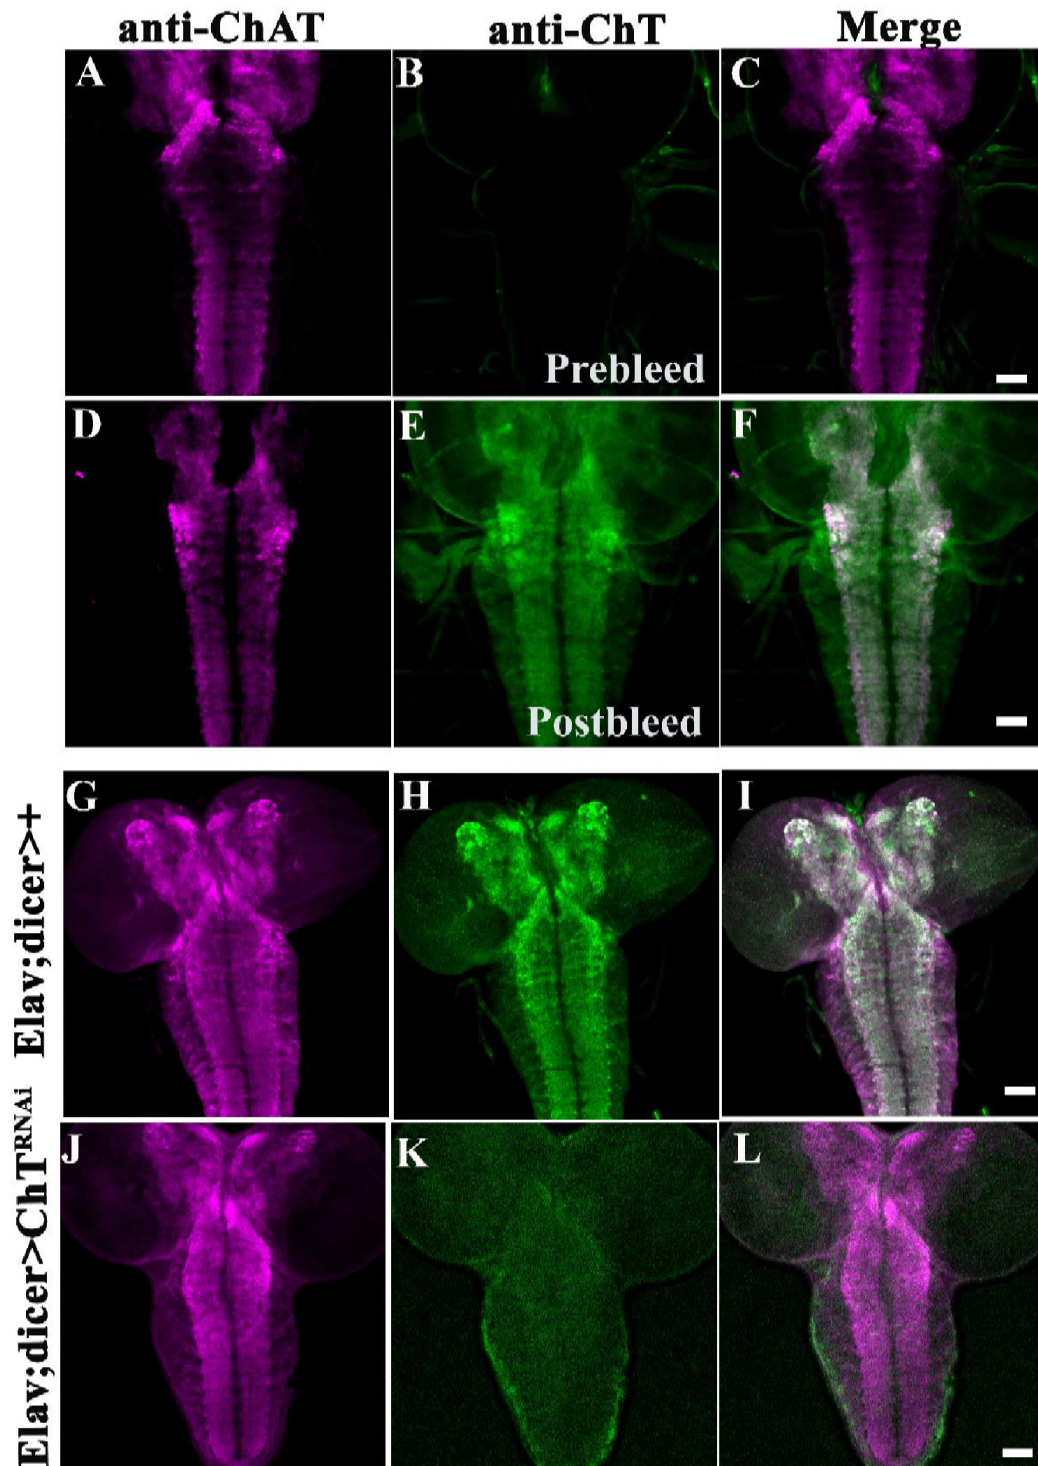

765

766

767

768

769

770

771 **Figure S1: *Drosophila* polyclonal anti-ChT antibody specifically detects endogenous ChT proteins**

772 (A) Immunostaining with *anti*-ChAT (4B1) antibody (magenta), (B) pre-bleed serum from rabbit, (C) merge  
773 image of A and B, (D) showing endogenous ChAT localization with anti-ChAT at neuropil of 3<sup>rd</sup> instar larval  
774 brain, (E) immunostaining with post-bleed serum (affinity purified) (green) (F) merged image showing  
775 colocalization of ChAT and ChT. (G-L) shows drastic reduction of ChT protein in *Elav;;dicer>ChT<sup>RNAi</sup>*  
776 compared to *Elav;;dicer>+* (green). Co-immunostaining with anti-ChAT was used as a control (magenta). All  
777 images are pseudocolored z-stack confocal images of third instar larval VNC, a representative image of  
778 immunostaining done in the 3-5 brains in each case. Scale bar, 100 $\mu$ m.

779  
780  
781  
782  
783  
784  
785  
786  
787  
788  
789  
790  
791  
792  
793  
794  
795  
796  
797  
798



799

800

801

## Figure S2:

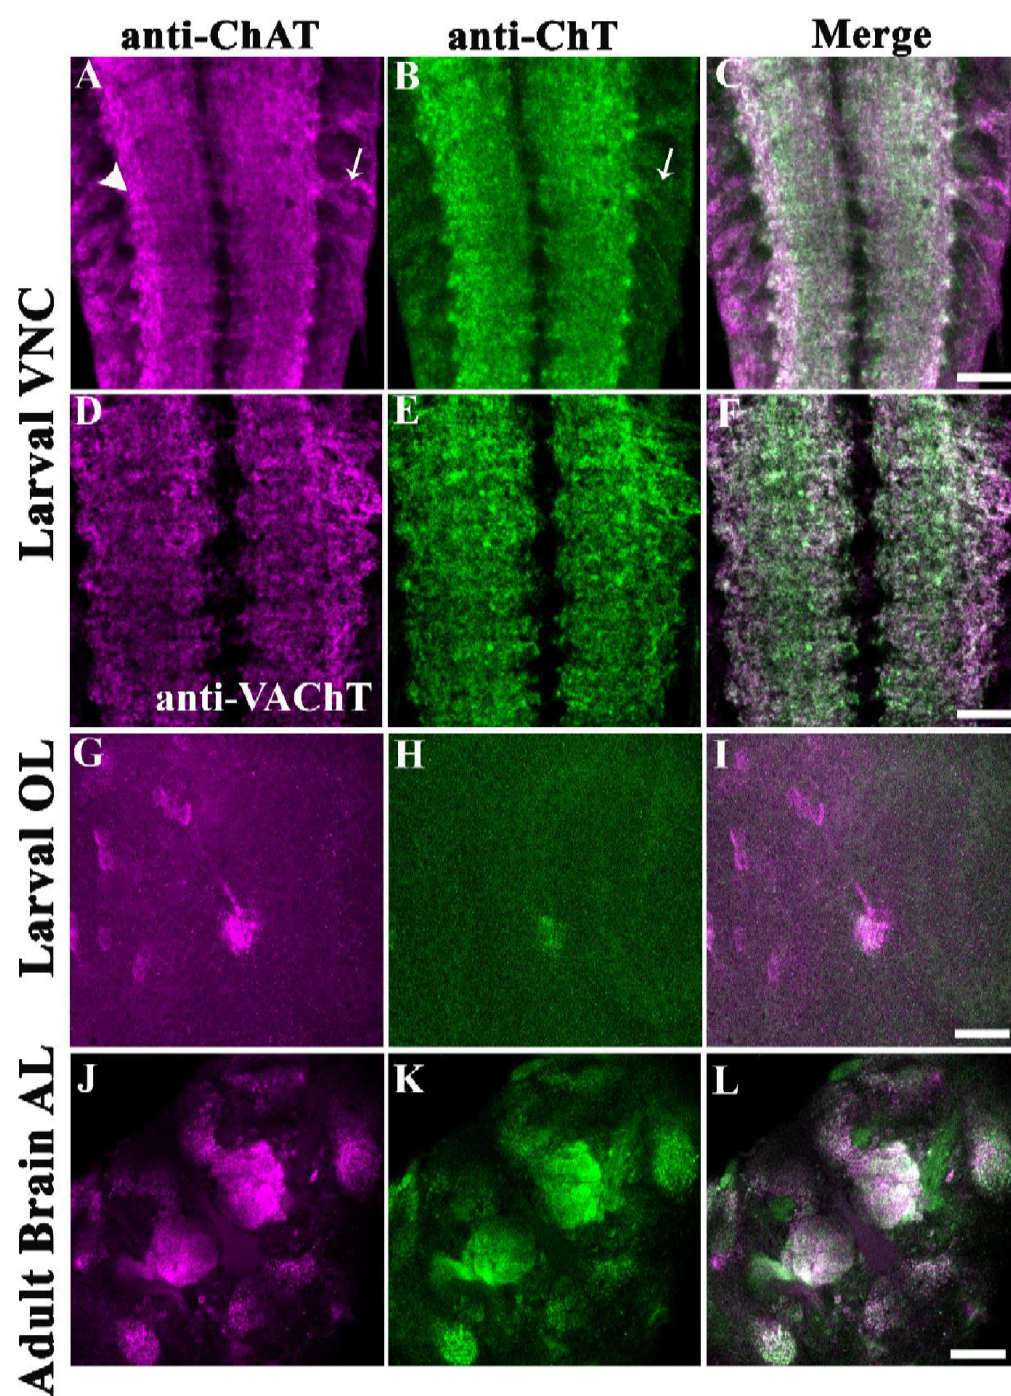

802

803

804

805

806

807

808 **Figure S2: ChT colocalizes with markers of cholinergic neurons and in areas with predominant**  
809 ***cholinergic synapses***

810 (A-C) Co-immunostaining with anti-ChAT (magenta), anti-ChT (green), and colocalization of ChAT and ChT  
811 as a merged image. (D-F) with anti-VAChT (magenta), anti-ChT (green), and colocalization of VAChT and  
812 ChT as a merged image. (G-I) shows colocalization of ChAT and ChT in Bolwig nerve in larval optic lobes  
813 (OL). (J-L) shows colocalization of ChAT and ChT in antennal lobes (AL) of the adult fly brain. Images  
814 shown here are the representative image of immunostaining done in the 3-5 brains in each case. Scale bar,  
815 50 $\mu$ m

816

817

818

819

820

821

822

823

824

825

826

827

828

829

830

831

832

833

834

835

836

837

838

### Figure S3:

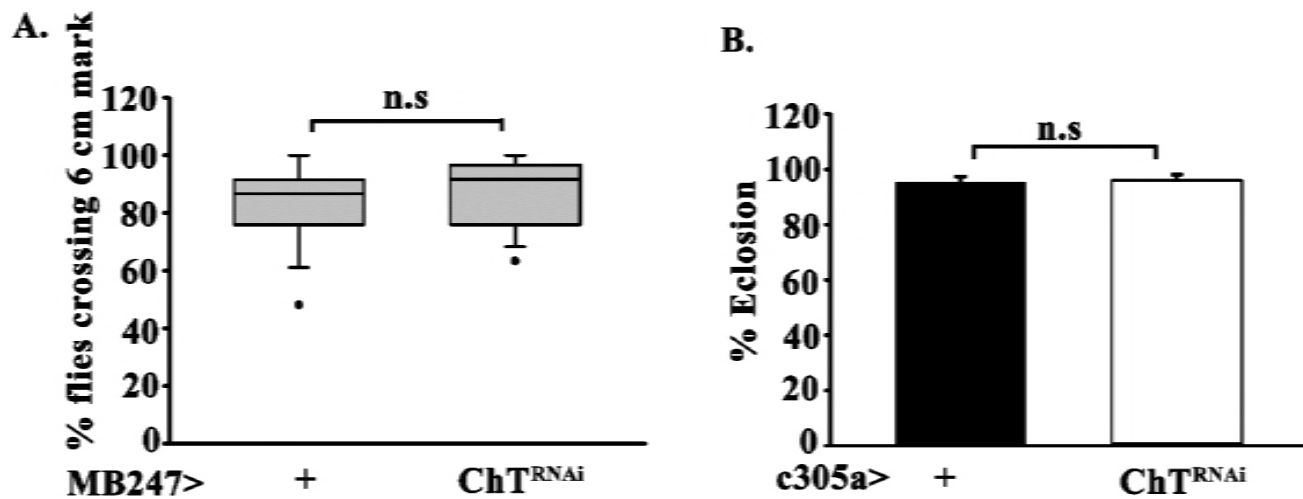

841

### Figure S3:

842

(A) Box plot showing percent climbing activity of MB247>ChT<sup>RNAi</sup> flies crossing 6 cm mark per 10 secs as

843

compared to MB247>+. Data shown here is derived from 12 assay vials per genetic group. Each assay vial

844

containing a mixed population of 10 male and female flies, n.s denote non-significance. (B) percentage

845

eclosion of c305aGAL4>ChT<sup>RNAi</sup> pupae as compared to its genetic control c305a>+. n.s denote non-

846

significance. Statistical significance was calculated using one-way ANOVA by *post-hoc* Tukey test for

847

pairwise comparison.

848

849

850

851

852

853

854

855

856

857

858

859



860

## Figure S4:

861

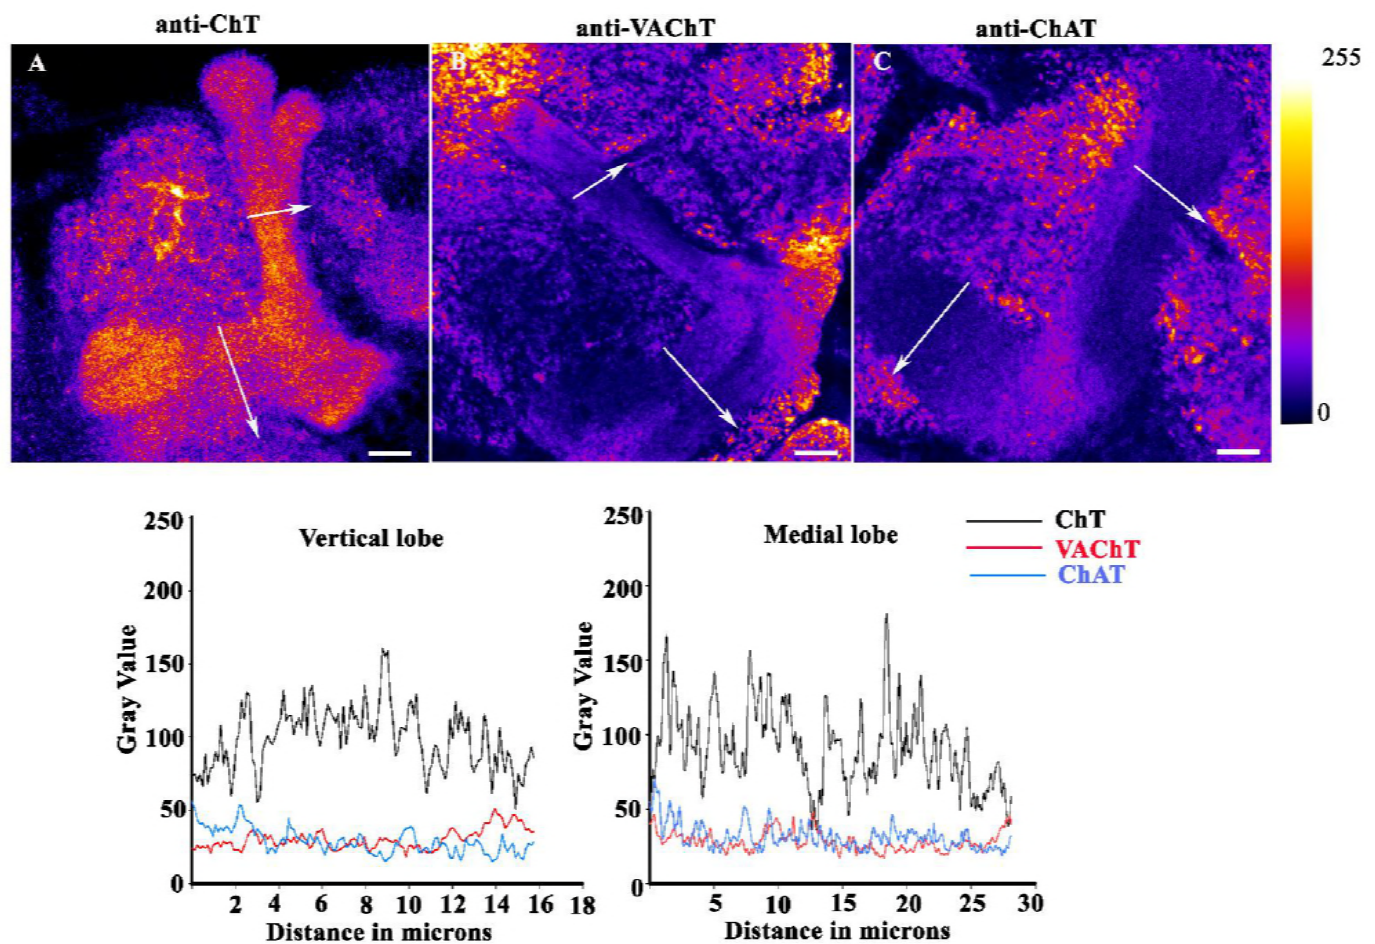

862

863

**Figure S4: Endogenous ChT is predominantly expressed in MB lobes as compared to its canonical**

864

***proteins of the cholinergic locus, ChAT, and VACHT***

865

(A-C) show images of MB lobes immunostained with anti-ChT (A), anti-VACHT (B) and anti-ChAT (C)

866

converted to Fire LUT map (using image J) that shows the scale of colors from 0-pixel intensity (minimum)

867

till 255-pixel intensity (maximum). White arrows show the direction of line intensity plot whose absolute

868

values are shown for vertical lobe (D) and Medial lobe (E) for ChT (black), VACHT (red), ChAT (blue). Scale

869

bar, 50 $\mu$ m

870

871

872

873

874 **Video 1:** Video showing 201Y driven ChT<sup>RNAi</sup> pupae are alive till more than the P14 stage of pupal  
875 development.

876 **Video 2:** Video showing 201Y driven ChT<sup>RNAi</sup> fly which partially ecloses and gets stuck in the pupal case.  
877
